Low temperature perception by FER-TORC1 triggers root hair growth

1 **Cell surface receptor kinase FERONIA linked to nutrient sensor TORC1 signaling**  
2 **controls root hair growth at low temperature in *Arabidopsis thaliana***

3  
4  
5 Javier Martínez Pacheco<sup>1,\*</sup>, Limei Song<sup>2,\*</sup>, Lenka Kuběnová<sup>3</sup>, Miroslav Ovečka<sup>3</sup>, Victoria Berdion  
6 Gabarain<sup>1</sup>, Juan Manuel Peralta<sup>1</sup>, Tomás Urzúa Lehuédé<sup>4,5</sup>, Miguel Angel Ibeas<sup>4,5</sup>, Sirui Zhu<sup>2</sup>,  
7 Yanan Shen<sup>2</sup>, Mikhail Schepetilnikov<sup>6</sup>, Lyubov A Ryabova<sup>6</sup>, José M. Alvarez<sup>4,7</sup>, Rodrigo A.  
8 Gutierrez<sup>7,8</sup>, Guido Grossman<sup>9</sup>, Jozef Šamaj<sup>3</sup>, Feng Yu<sup>2,†</sup> & José M. Estevez<sup>1,4,5,8,†</sup>

9  
10  
11 <sup>1</sup>Fundación Instituto Leloir and IIBBA-CONICET. Av. Patricias Argentinas 435, Buenos Aires  
12 C1405BWE, Argentina.

13 <sup>2</sup>State Key Laboratory of Chemo/Biosensing and Chemometrics, College of Biology, and Hunan  
14 Key Laboratory of Plant Functional Genomics and Developmental Regulation, Hunan University,  
15 Changsha 410082, P.R. China.

16 <sup>3</sup>Department of Biotechnology, Faculty of Science, Palacký University Olomouc, Šlechtitelů 27,  
17 783 71 Olomouc, Czech Republic.

18 <sup>4</sup>Centro de Biotecnología Vegetal, Facultad de Ciencias de la Vida, Universidad Andres Bello.

19 <sup>5</sup>ANID - Millennium Nucleus for the Development of Super Adaptable Plants (MN-SAP), Santiago,  
20 Chile.

21 <sup>6</sup>Institut de Biologie Moléculaire des Plantes, CNRS, UPR 2357, Université de Strasbourg,  
22 Strasbourg, France.

23 <sup>7</sup>Centre FONDAF Center for Genome Regulation, Santiago, Chile; Departamento de Genética  
24 Molecular y Microbiología, Facultad de Ciencias Biológicas, Pontificia Universidad Católica de  
25 Chile, Santiago, Chile.

26 <sup>8</sup>ANID - Millennium Institute for Integrative Biology (iBio), Santiago, Chile.

27 <sup>9</sup>Institute of Cell and Interaction Biology, Heinrich-Heine-University Düsseldorf, Germany; Cluster  
28 of Excellence in Plant Sciences, Heinrich-Heine-University Düsseldorf, Germany.

29  
30  
31  
32 \*Co-first authors.

33 †Correspondence should be addressed. Email: [feng\\_yu@hnu.edu.cn](mailto:feng_yu@hnu.edu.cn) (F.Y) and  
34 [jestevez@leloir.org.ar](mailto:jestevez@leloir.org.ar) (J.M.E)

## Low temperature perception by FER-TORC1 triggers root hair growth

### 35 **Abstract**

36  
37 Root hairs (RH) are excellent model systems for studying cell size and polarity since they elongate  
38 several hundred-fold their original size. Their tip growth is determined both by intrinsic and  
39 environmental signals. Although nutrient availability and temperature are key factors for a  
40 sustained plant growth, the molecular mechanisms underlying their sensing and downstream  
41 signaling pathways remain unclear. Here, we identified that low temperature (10°C) triggers a  
42 strong RH elongation response involving the cell surface receptor kinase FERONIA (FER) and the  
43 nutrient sensing TOR Complex 1 (TORC1). In this study, we found that FER is required to perceive  
44 limited nutrient availability caused by low temperature. FER interacts with and activates TORC1-  
45 downstream components to trigger RH growth. In addition, the small GTPase Rho-related protein  
46 from plants 2 (ROP2) is also involved in this RH growth response linking FER and TORC1. We also  
47 found that limited nitrogen nutrient availability can mimic the RH growth response at 10°C in a  
48 NRT1.1-dependent manner. These results uncover a molecular mechanism by which a central  
49 hub composed by FER-ROP2-TORC1 is involved in the control of RH elongation under low  
50 temperature and nitrogen deficiency.

51

52

53

54 Abstract Word counts 189

55

56 Text Word counts 3,885

57 Figures 1-6

58

59

60 Passwords: Arabidopsis, cell surface, FERONIA, nitrogen, low temperature, root hairs, ROP2, TOR  
61 kinase.

## Low temperature perception by FER-TORC1 triggers root hair growth

### 62 Introduction

63  
64 Root hairs (RH) are cell outgrowths that develop as cylindrical protrusions from the root  
65 epidermis in a developmentally regulated manner<sup>1</sup>. RHs are able to expand in a polar manner  
66 several hundred times their original size in a couple of hours to reach water-soluble nutrients in  
67 the soil, to promote interactions with the local microbiome, and to support the anchoring of the  
68 plant<sup>2</sup>. RH growth is controlled by the coordination of a plethora of environmental and  
69 endogenous factors<sup>3,4</sup>. Recently, an autocrine mechanism of RH growth was described where  
70 RALF1-FER complex recruits and phosphorylates the early translation initiation factor 4E1  
71 (eIF4E1) to enhance protein synthesis of specific mRNAs, including the RH growth master  
72 regulator *ROOT HAIR DEFECTIVE SIX-LIKE4 (RSL4)*<sup>5</sup>. The observation that RH cells can respond to  
73 their local environment in a cell-autonomous manner within minutes<sup>6</sup>, points towards  
74 mechanisms that directly modulate the growth machinery at the growing apex.

75  
76 It is known that macronutrient availability is a key factor that promotes rapid RH growth<sup>3,7,8</sup>  
77 Recently, we showed that under low temperature conditions (10°C), nutrient availability in the  
78 media is reduced and triggers an enhanced RH growth that is suppressed if nutrients are  
79 increased<sup>9</sup>. We specifically showed that RH growth of WT Col-0 plants is highly responsive to  
80 increasing nutrient concentrations (from 0.5X Murashige and Skoog (MS) to 2.0X MS) with regular  
81 concentration gelling agents (0.8%). High nutrient concentration impairs RH growth even if they  
82 are exposed to low temperatures. In a similar manner, an increase in agar concentration (from  
83 0.8% to 2.5%) in the MS medium, which likely restrains nutrient mobility and nutrient uptake<sup>10-13</sup>  
84 blocked low temperature-induced RH elongation<sup>9</sup>. These observations suggested that low  
85 temperature restrict nutrient mobility and availability in the culture medium, leading to  
86 promotion of polar RH growth. It is still unclear which specific nutrients are affected and the  
87 signaling pathways involved in the temperature effect that triggers this RH growth response.  
88 Diminished nutrient availability is known to activate RH expansion through a transcriptional  
89 reprogramming governed by the transcription factors (TF) RHD6-RSL4<sup>9</sup>. Specifically, a novel  
90 ribonucleoprotein complex composed of lncRNA AUXIN-REGULATED PROMOTER LOOP (APOLO)  
91 and the TF WRKY42 forms a regulatory hub to activate RHD6 by shaping its epigenetic  
92 environment and integrate low temperature signals governing RH growth<sup>9,14</sup>. In addition, we  
93 recently identified new molecular components involved in low temperature RH growth. We  
94 found that cell wall-apoplastic related peroxidases, PRX62 and PRX69, are important for low  
95 temperature triggered RH growth by inducing changes in ROS homeostasis and cell wall EXTENSIN  
96 insolubilization<sup>15</sup>. Although relevant advances have been achieved in our understanding on how  
97 RH growth occurs at low temperature, it is still unclear how nutrient availability caused by low  
98 temperature is perceived in the RH cells and the extent of molecular responses that control RH  
99 growth.

## Low temperature perception by FER-TORC1 triggers root hair growth

100  
101 TARGET OF RAPAMYCIN (TOR) is an evolutionarily conserved Ser/Thr protein kinase in all  
102 eukaryotic organisms that acts as a central growth regulator controlling metabolism and protein  
103 synthesis<sup>16–18</sup>. TOR is found in at least two distinct multiprotein complexes called TOR Complex 1  
104 and 2 (TORC1 and TORC2) in animal cells, although only TORC1 has been experimentally validated  
105 in plants<sup>19,20</sup>. The *Arabidopsis* TORC1 complex is encoded by one *TOR* gene (*AtTOR*)<sup>21</sup>, two  
106 *REGULATORY-ASSOCIATED PROTEIN OF TOR (RAPTOR 1A and 1B)* genes<sup>22–27</sup>, and two *LETHAL*  
107 *WITH SEC THIRTEEN 8 (LST8)* genes<sup>28</sup>. In contrast to the embryo-lethal *tor*-null mutant lines,  
108 *raptor1b* and *lst8-1* mutants are viable but show significant growth defects and developmental  
109 phenotypes<sup>29</sup>. Some canonical downstream targets of TOR are conserved in plants, such as the  
110 40S ribosomal S6 kinase (S6K) which stimulates protein synthesis<sup>24,30–33</sup>. In plants, TORC1 complex  
111 plays a key role during many stages of the plant life cycle by controlling both anabolic and  
112 catabolic downstream processes. In addition, TORC1 is activated by nutrient availability and  
113 inactivated by stresses that alter cellular homeostasis<sup>18,34–38</sup>. The TORC1 complex senses and  
114 integrates signals from the environment to coordinate developmental and metabolic processes  
115 including hormones (e.g., auxin), several nutrients (e.g., nitrogen and sulfur), amino acids and  
116 glucose<sup>16,27,39–43</sup>. However, the underlying molecular mechanism by which TORC1 operates at a  
117 single plant cell level has yet to be elucidated.

118  
119 To date, few upstream regulators of TOR have been described in plants. Among them, there is a  
120 subfamily of small GTPase Rho-related protein from plants (ROPs) involved in the spatial control  
121 of cellular processes by signaling to the cytoskeleton and vesicular trafficking. Particularly, ROP2  
122 activates TOR in response to auxin and nitrogen signals<sup>43–45</sup>. ROP2 is described as a monomeric  
123 GTP-binding protein that participates in many cellular signaling processes, including the polar  
124 growth of pollen tubes and root hairs<sup>46–49</sup>. ROP activation is regulated by ROP guanine nucleotide  
125 exchange factors (ROP-GEFs) which interact with several receptor-like kinases (RLKs) including  
126 the *CrRLK* family member *FERONIA (FER)*<sup>47</sup>. During the elongation of RH, ROP2 is activated by the  
127 ROPGEF1-FER interaction. This process is also regulated by ROP-GEF4 and ROP-GEF10<sup>47,50</sup>. FER  
128 was also linked to carbon/nitrogen balance during plant growth<sup>51</sup>. Even more, it was shown that  
129 the cytoplasmic kinase domain of FER and its partner RIPK (RPM1-induced protein kinase)  
130 interact with TOR and RAPTOR-1B forming a complex to positively modulate the TOR pathway  
131 under low nitrogen nutrient conditions<sup>52</sup>. Currently, it is clear that plant growth can be regulated  
132 via the FER-TOR pathway as it links amino acid and/or nutrients signaling with true leaves  
133 development<sup>51</sup>. This evidence suggests that nutrient-mediated sensing at the cell surface level  
134 triggers a response using the TOR signaling pathway. However, it is still unknown which are the  
135 environmental signals activated in RH by the FER-TORC1 pathway in RH. Considering that low  
136 temperature stress can result in enhanced RH growth<sup>9,14</sup>, this stress condition was used as a  
137 proxy to investigate environmental signals that activate RH cell elongation. Our research reveals a

## Low temperature perception by FER-TORC1 triggers root hair growth

138 novel mechanism in which FER, ROP2 and TORC1 are necessary to regulate RH growth in  
139 *Arabidopsis* in the context of the nitrogen nutrient availability as caused by low temperature  
140 stress.

141

## 142 Results

143

144 **FER is required to trigger a strong RH growth response at low temperature.** We asked which  
145 might be the RH surface protein involved in perceiving or transducing the low temperature  
146 stimulus. Since CrRLK1L FER was shown as an important hub between the cell surface signaling  
147 and downstream processes during RH growth<sup>5,47</sup>, we tested whether *fer-4* null mutant or *fer-5* (a  
148 truncated version with shortened kinase domain (KD)) can respond to low temperature stimulus  
149 (**Figure S1**). Both *fer* mutants failed to trigger RH growth at low temperature (**Figure 1A**). In  
150 contrast, the mutant *eru*, impaired in the related CrRLK1L ERULUS (ERU), previously linked to RH  
151 growth and cell wall integrity processes with very short RH phenotype at 22°C<sup>53,54</sup>, was able to  
152 react to low temperature which triggered RH growth response although to a lower extent than  
153 wild-type Col-0 plants (**Figure 1A**). This indicates that FER, but not ERU, might be involved  
154 specifically in this growth response despite being phylogenetically related<sup>54</sup>. Then, a fluorescent  
155 translational reporter line of FER (*pFER:FER-GFP*), was used to study *FER* expression in roots and  
156 RH. FER protein levels are increased clearly activated in root cells under low temperature  
157 stimulus (**Figure 1B**), and during RH growth (**Figure 1C**). Distribution of FER-GFP in the clear zone  
158 and punctate compartments in the cytoplasm was not affected by the temperature change from  
159 22°C to 10°C. However, accumulation of FER-GFP at the plasma membrane was increased at low  
160 temperature (at 10°C) (**Figure 1C**). Finally, phosphorylated, and non-phosphorylated levels of FER  
161 (FER-p/FER) were quantified at both temperatures. Under low temperature, almost half of the  
162 FER protein levels were present as a non-phosphorylated form and after 3 days of growth, almost  
163 all FER protein was present as a phosphorylated version (**Figure 1D**). This indicates that low  
164 temperature not only increases FER protein levels at the plasma membrane of growing RH, but  
165 also promotes a complete phosphorylation of FER protein. This is possibly enhancing the  
166 interaction with putative partners and triggering the activation of downstream signaling  
167 components of RH polar growth.

168

169 **TORC1 pathway is involved in low temperature induced RH growth.** Recently, it was shown that  
170 FER-RIPK interacts with TOR-RAPTOR1B and phosphorylates it leading to TOR pathway activation  
171 in the context of nutrient perception and regulation of global metabolism<sup>52</sup>. We then asked  
172 whether TOR might be also involved in the RH growth process under low temperature. We used a  
173  $\beta$ -estradiol (es)-induced TOR knockdown (*tor-es*, es-induced RNAi silencing of TOR) line<sup>55</sup> which  
174 showed short RH as reported previously<sup>32</sup>. Notably, induction of TOR silencing with estradiol  
175 completely blocked the RH response to low temperature (**Figure 2A**). Similarly, inhibition of TOR

## Low temperature perception by FER-TORC1 triggers root hair growth

176 kinase activity with AZD-8055<sup>56</sup>, an ATP-competitive inhibitor of mTOR kinase activity, abolished  
177 the RH growth at both 22°C and low temperature (**Figure 2B**). Overexpression of TOR enhanced  
178 RH growth at both temperatures assayed (**Figure 2C**). These results suggest that the TOR pathway  
179 is involved in the RH growth and specifically in RH low temperature growth response and might  
180 operate downstream of FER. At the transcriptional level, TOR root expression level is upregulated  
181 up to three-folds at 10°C vs 22°C (**Figure S2**). We tested whether the growth response at low  
182 temperature in RH is also affected in mutants of the TORC1 pathway and some downstream  
183 components. All the plant mutants tested (*raptor1b*, *rps6b*, and *lst8-1*) were unable to respond to  
184 the low temperature treatment. They exhibited a broad spectrum of RH phenotypes as compared  
185 to Wt Col-0 plants (**Figure 2C**). For instance, *raptor1b* behaved similarly to *tor-es* mutant, while  
186 *rps6b* showed an intermediate phenotype and *lst8* was comparable to Wt Col-0 plants (at 22°C)  
187 (**Figure 2C**). In addition, overexpression of TOR and the S6 KINASE 1 (S6K1), a direct downstream  
188 target of TOR, showed enhanced RH growth at 22°C. Since previous reports showed  
189 phosphorylation of the S6K1 can be used to monitor TOR protein kinase activity in plants<sup>32,55</sup>, we  
190 measured ratios of S6K-p/S6K. Strong induction of the S6K-p/S6K ratio was observed in Wt Col-0  
191 under low temperature (**Figure 2D**). These results suggest TORC1 and some downstream  
192 components (e.g. S6K and RPS6b) are required to promote RH growth under low temperature.

193  
194 **FER facilitates TOR polar localization in RH and activation of TORC1 pathway at low**  
195 **temperature.** Since TORC1 activation under a plethora of stimuli usually triggers phosphorylation  
196 of the downstream factor S6K (S6K-p), we asked whether low temperature responses regulated  
197 by FER might control this output. We investigated the molecular mechanisms by which TORC1-  
198 S6K are induced at 10°C and we tested whether this might be mediated by FER. Since *fer-4* and  
199 *tor-es* showed similar RH phenotypes at low temperature (**Figure 2A-B**), possibly indicating that  
200 they may act in the same pathway, we first tested whether FER and TOR interaction is enhanced  
201 under 10°C vs 22°C. By performing a co-immunoprecipitation (Co-IP) analysis, we found that FER-  
202 TOR interaction is enhanced under low temperature (**Figure 3A**). This result suggests an  
203 interaction between FER and TOR kinase is implicated in RH growth under low temperature. This  
204 corroborates previous findings that showed direct interaction of the FER kinase domain and the  
205 N-terminal domain of TOR (aa 1-1449 of TOR, NTOR)<sup>52</sup>. Next, we evaluated TOR levels in growing  
206 RH by immunolocalization. We found that FER is required for the apical accumulation of TOR  
207 since TOR lost the polar pattern in *fer-4* root hairs. However, the level of RH tip-localized TOR  
208 detected was similar at both, low temperature, and control conditions (22°C) (**Figure 3B-C**). This  
209 result indicates that localization of TOR at RH tip is dependent on FER. Then, we tested whether  
210 FER is involved in S6K activation by TOR. We measured S6K-p/S6K protein ratio under both  
211 growth conditions in Wt Col-0, *fer-4*, *fer-5*, and FER<sup>K565R</sup> (which has been shown to abolish FER  
212 autophosphorylation and transphosphorylation in an *in vitro* kinase activity assay<sup>57,58</sup>, although  
213 some activity might remain<sup>59</sup>). Interestingly, low temperature enhanced S6K-p levels after 3 days

Low temperature perception by FER-TORC1 triggers root hair growth

214 of growth in Wt Col-0 this was partially suppressed in all three *fer* mutants tested (**Figure 3D**).  
215 This suggests that FER controls the level of TORC1 activation under low temperature in RH.  
216 Collectively, these results indicate that TOR localization in the RH tip and TORC1 activation is  
217 dependent on FER and enhanced at low temperature.

218  
219 **Nitrate perception and transport mediated by NRT1.1 controls RH growth at low temperature.**  
220 Nitrate is a key nitrogen nutrient required for plant growth and development<sup>60–62</sup>. The  
221 CHLORINA1/NITRATE TRANSPORTER1.1 (CHL1/NRT1.1) is the only known nitrate receptor  
222 (transporter and receptor)<sup>63–65</sup> as well as for auxin transport<sup>66</sup>. NRT1.1 belong to the low affinity  
223 nitrate transporter family. However, when NRT1.1 is phosphorylated at threonine 101, it behaves  
224 as a high-affinity NO<sub>3</sub><sup>-</sup> (nitrate) transporter, giving this protein a dual-affinity capability<sup>67–70</sup>.  
225 Previous studies have shown that nitrogen and specifically nitrate is important for TOR  
226 signaling<sup>43,71</sup>. Since low temperature growth conditions reduce nutrient availability in the media  
227 and trigger a strong response in RH growth<sup>9,14</sup>, we hypothesized that the nitrate signaling  
228 pathway was involved. We found that high levels of nitrate (18.8 and 37.6 mM) supplied in the  
229 M407 media without nitrogen (see methods) were able to partially repress low temperature-  
230 mediated RH growth while low levels of nitrate (0.5 mM) did not affect growth under this  
231 temperature (**Figure 4A**). As a reference, previous experiments were carried out with 0.5X MS  
232 media containing 9.3 mM of nitrate and several other compounds (see **Table S1**). This result  
233 indicated nitrate can impact RH cell elongation at low temperature, particularly under low  
234 nutrient mobility environment. Next, we tested whether NRT1.1 was involved in this low  
235 temperature RH growth response. The NRT1.1 null mutants *chl1-5*, *chl1.9* (NRT1.1 harbors a  
236 substitution P492L that suppresses its root nitrate uptake activity<sup>8</sup>), as well as the *CHL1*<sup>T101D</sup>  
237 (which mimics phosphorylated version of NRT1.1) showed strong RH growth response regardless  
238 of temperature conditions (**Figure 4B**), similarly to *S6K1 OE* and *TOR OE* lines (**Figure 2C**), but to a  
239 lower extent in terms of RH elongation. Only the *CHL1*<sup>T101A</sup> (dephosphorylated version of NRT1.1)  
240 was able to slightly respond to the change in temperature. As expected, similar levels of S6K-  
241 p/S6K were detected in the *chl1-9* line at both temperatures (**Figure 4C**). When these NRT1.1  
242 mutants were grown under high (18.8 mM) or low (0.5mM) nitrate concentrations (high N/low N)  
243 at both temperatures (at 22°C and at 10°C), a similar RH phenotype was detected between both  
244 nitrate conditions either at 22°C or 10°C (**Figure 4D**). In contrast, Wt Col-0 RH was sensitive to  
245 both low temperature and nitrate levels. Taken together, these results suggest low temperature  
246 may restrict nitrate accessibility to the RH linked to a lower mobility in the media affecting  
247 NRT1.1-mediated signaling upstream of TORC1-S6K activation.

248  
249 **ROP2 is required for low temperature RH growth.** Previous studies have shown a key role of  
250 ROP2 in the regulation of RH polarity and elongation<sup>48,72,73</sup>, as an important molecular link  
251 between FER and downstream components involved in RH growth<sup>47</sup>. In addition, ROP2 promotes

## Low temperature perception by FER-TORC1 triggers root hair growth

252 the activation of TOR and its relocation to the cell periphery and induces the downstream signal  
253 transduction pathway<sup>44</sup>. More importantly, ROP2 was shown to integrate diverse nitrogen and  
254 hormone signals for TOR activation<sup>43</sup>. We asked whether low temperature (10°C) is able to  
255 change ROP2 targeting (as ROP2p:ROP2-mCitrine) to the plasma membrane in roots and RH. Low  
256 temperature (10°C) led to noticeable increase of ROP2 fluorescence intensity in root cells (**Figure**  
257 **5A**), in the apical and subapical cytoplasm, and at the apical plasma membrane of RH (**Figure 5B**).  
258 Then, we observed that *rop2* and *rop2 rop4* abolishes the differential growth responses at 10°C  
259 and produces a very short RH phenotype (**Figure 5C**). On the contrary, ROP2 OE triggers a  
260 constitutive RH growth at both temperatures (**Figure S3**) similarly to *S6K1 OE* and *TOR OE* lines  
261 (**Figure 2C**). In addition, when ROP2 OE is expressed in the *fer* mutant background *fer-8* (ROP2  
262 OE/*fer-8*; **Figure S3**), this strong growth effect disappears highlighting the role of FER on the ROP2  
263 function. On the other hand, while high levels of TOR enhance RH growth regardless of the  
264 temperature treatments, the constitutively active ROP2 version (CA-ROP2) is able to abolish TOR  
265 activation of RH growth (**Figure 5C**). The levels of S6K-p/S6K in TOR OE, with constitutive long RH  
266 at both temperatures, was reduced by the presence of CA-ROP2 (in TOR OE/CA-ROP2), which  
267 correlates with a diminished RH growth (**Figure 5D**). Taken together, we suggest a direct function  
268 of ROP2 (and possibly ROP4) at the RH tip. ROP2 function is dependent on the presence of FER  
269 and it modulates TOR activity in the RH growth responses to low temperature.

270  
271 **FER-ROP2-TORC1 hub is required for nitrate starvation-mediated RH growth response.** Recently  
272 it was reported that RALF1-FERONIA complex is able to interact with TOR kinase under low N  
273 conditions modulating the TORC1 downstream signaling pathway<sup>52</sup>. As described above, we  
274 found that Col-0 grown at 22°C under high N condition have a shorter RH phenotype as compared  
275 to low N condition. This growth response is consistent with previous studies in which the RH  
276 length in *Arabidopsis* and other species decrease as the nitrate concentration increases although  
277 the molecular mechanism remained unknown<sup>60,74</sup>. To gain a better insight into the role of FER  
278 and TOR in this process, we decided to test the *fer* mutants, the TORC1 pathway mutants and  
279 selected overexpressing lines (TOR and S6K) in low (0.5 mM) and high nitrate (18.8 mM) media  
280 conditions (**Figure 6A** and **Figure S4**). Under low nitrate conditions, the RH response was  
281 suppressed in both *fer* mutants and in the *tor-es* inducible mutant compared to Col-0. This result  
282 supports the idea that FER and TOR are necessary for the RH growth mediated by low nitrate  
283 conditions. The *TOR OE* line showed a RH growth phenotype similar to Col-0 under low N and a  
284 higher RH growth in excess of N. It is well known that nitrogen starvation causes enhanced root  
285 and RH growth, whereas an excess of nitrate inhibits primary root growth<sup>75</sup>, because of osmotic  
286 stress<sup>71</sup>. Furthermore, plants overexpressing TOR in a nitrate excess medium have a longer  
287 primary root phenotype<sup>71</sup>. According to our data that *TOR OE* line showed longer RH than Col-0  
288 under normal conditions (**Figure 6A**). The constitutive overexpression of TOR can lead not only to  
289 a longer primary root but also to longer RH when plants are grown on a high nitrate media to



## Low temperature perception by FER-TORC1 triggers root hair growth

290 alleviate the nutrient stress. The constitutive active mutant of ROP2 suppressed the TOR OE RH  
291 phenotype while *rop2* mutant was unable to respond to contrasting levels of nitrates. A model  
292 was proposed where ROP GTPases and the cytoplasmic and apoplasmic pH fluctuations can  
293 regulate RH tip growth in a nitrogen supply dependent manner thus maintaining the  
294 unidirectional growth during the RH elongation<sup>77</sup>. Additionally, nitrate and ammonium levels  
295 restore TOR activation under nitrogen-starvation condition via ROP2 activation<sup>43</sup>. We then tested  
296 if other components on the TORC1 complex are also involved in the low nitrate perception linked  
297 to RH growth (**Figure 6B**). Similarly to their low temperature phenotype, *raptor1b* and *lst8-1* do  
298 not respond with differential RH growth under low nitrate. Mutation of RAPTOR1B resulted in a  
299 strong reduction of TOR kinase activity, leading to massive changes in carbon and nitrogen  
300 metabolism<sup>78</sup>. The RH phenotype derived from the overexpression of S6K resembled that of TOR  
301 OE line (**Figure 6A, 6B**). Altogether, our results show that low-nitrate (low N) RH responses are  
302 similar to those determined for low temperature. This is consistent with the idea that nitrate is  
303 one of the main signals that trigger RH expansion upon perception by NRT1.1, and subsequently  
304 transduction by FER, ROP2 and TORC1 pathway. We then tested how changed are the levels of  
305 S6K-p/S6K as a readout of TORC1 activation in low N and high N conditions in FER, TOR silenced  
306 line (*tor-es*) and NRT1.1 mutants compared to Wt Col-0 (**Figure 6C**). First, Wt Col-0 showed an  
307 increased in S6K-p/S6K ratio in low nitrogen similarly to the low temperature effect. On the  
308 contrary, and as expected, *fer-4*, *fer-5* and *tor-es* showed much reduced levels of S6K-p/S6K in  
309 both nitrate conditions but much lower in low nitrogen. Importantly, the effect of low N on  
310 increasing S6K-p levels is abolished in NRT1.1 mutants (*chl1-9*, *chl1-5* and *CHLT101D*), which is  
311 similar to the results observed under low temperature conditions. These results indicate that  
312 nitrate effect on S6K-p/S6K ratio depends on NRT1.1 and the FER-TOR complex.

313  
314 Since an integrative gene regulatory network analysis of TF–target interactions positioned TGA1  
315 and its homolog TG4 as the most influential TFs in the nitrate response<sup>79,80</sup>, we decide to test if  
316 they play a role in the response to low temperature in RHs and low/high levels of Nitrogen  
317 (**Figure S5**). As expected *tga1 tga4* double mutant failed to respond to low temperature and low  
318 nitrogen while TGA1 OE showed a constitutive growth response regardless the temperature and  
319 nitrogen levels. This confirms that nitrate, NRT1.1 and its downstream signaling pathway  
320 including the transcriptional responses controlled by TGA1-TG4 act an important pathway in RH  
321 growth at low temperature.

322

## 323 Discussion

324

325 Growth and development of plants and animals are based on nutrient and hormonal signaling  
326 that constitute as the main regulatory networks in eukaryotes. Unraveling the functions of the  
327 regulatory hubs and their detailed molecular mechanisms are critical for deeper understanding of

## Low temperature perception by FER-TORC1 triggers root hair growth

328 these signaling pathways. In all cells, there is a central hub composed by the evolutionarily  
329 conserved TOR protein kinase that integrates nutrient and energy levels coupled to stress  
330 signaling networks to further modulate cell growth<sup>81-84</sup>. In addition, the cell surface receptor FER  
331 acts as a versatile sensor of signals coming from the environment<sup>51,85,86</sup>. Specifically, our study  
332 uncovers a new molecular mechanism by which plants use FER-ROP2-TORC1 signaling pathway to  
333 control RH elongation under low nutrient conditions, specifically nitrate, induced by low  
334 temperature stress (**Figure S6**).

335  
336 In this work, we discovered that the cell surface FER receptor regulates TOR apical localization  
337 and further downstream activation, both controlling S6K phosphorylation linked to RH growth.  
338 Based on the results obtained and previous evidences, here we propose a model in which the  
339 FER-ROP2-TORC1 axis might be able to regulate the RH growth under low temperature with  
340 remarked attention to variable nitrate conditions (**Figure S6**). In agreement with this, it was  
341 previously shown that ROP2 in response to auxin is an upstream effector of TOR activation<sup>44</sup> and  
342 by inorganic and organic nitrogen inputs<sup>43</sup>. In addition, FER was shown to directly activate the  
343 TOR/RAPTOR1B signaling pathway under low inorganic and organic nitrogen conditions<sup>52</sup> and is  
344 an upstream regulator of the ROPGEF4-ROP2 signaling pathway that controls ROS-mediated RH  
345 development<sup>47,87</sup>. In addition, ROP2 promotes TOR accumulation close to the cell periphery<sup>44</sup>,  
346 suggesting that plasma membrane-localized FER together with ROP2 function in regulating the  
347 relocation of TOR, close to the RH tip. Interestingly, such a local, non-genomic regulatory circuit  
348 may also explain the rapid, cell-autonomous growth regulation in RH cells observed under  
349 asymmetric conditions in the dual-flow-RootChip<sup>6</sup>. All these findings are in line with our results  
350 and support the idea of the existence of the FER-ROP2-TORC1 pathway being highly relevant for  
351 RH growth in a changing nutritional environment. Interestingly, we recently showed that FER  
352 regulates localized protein synthesis during polar RH cell growth<sup>5,88</sup>, suggesting that FER-TOR may  
353 also regulates polar protein synthesis in RHs. All the data together clearly highlight a key role of  
354 the FER-ROP2-TORC1 pathway as a core complex in sensing nutrients (e.g. nitrates) to direct RH  
355 growth.

356  
357 Nitrogen is an essential nutrient for plants that when scarce limits plant growth. Although  
358 inorganic nitrogen (e.g. nitrate) is a major source of nitrogen for plants in soil, organic forms of  
359 nitrogen, like amino acids, can also be assimilated by plants from soil<sup>89,90</sup>. Changes in nitrate  
360 concentrations in the media mimicked this response at low temperature and NRT1.1 mutants are  
361 insensitive at RH growth level regardless the temperature or nitrate levels. We hypothesize that  
362 low nitrate in the media might rapidly induce the levels of mature-active RALF1 (and possibly  
363 other RALF peptides), which might then activate the FER-ROP2-TORC1 pathway and the  
364 downstream fast cell elongation effect to search for further nutrients sources. This autocrine  
365 mechanism dependent on RALF1-FER growth activation has been demonstrated for RH<sup>88</sup>, but not

## Low temperature perception by FER-TORC1 triggers root hair growth

366 in a context that involves low temperature/low nitrate and TORC1 pathway. It is expected that  
367 low nitrates levels will impact on amino acid homeostasis. In line with our results, branched-chain  
368 amino acids have been shown to serve as upstream activators of TOR in plants<sup>40</sup>. TOR is also  
369 involved in mediating amino acid-derived metabolic regulatory signals that influence respiratory  
370 activity and plant metabolic rate<sup>91</sup>. Specifically, a total of 15 proteinogenic amino acids can  
371 reactivate TOR under inorganic-N starvation conditions<sup>43</sup>. In addition, the FER-TOR pathway  
372 responds to Gln, Asp, and Gly, reinforcing that amino acids serve as conserved upstream  
373 regulators of the TOR signaling pathway in animals and plants<sup>52</sup>. It is tempting to speculate that  
374 under low nitrates condition (and low temperature), the RH cell compensates with an altered  
375 amino acid homeostasis to trigger TOR activation linked fast cell growth.

376  
377 Finally, several questions in our proposed model remain to be answered in future studies. How  
378 does low nitrate concentration (low temperature) triggers FER-TORC1 activation?. Does RALF1  
379 and other RALFs respond to low nitrate to activate FER?. Does FER activate NRT1.1 directly?.  
380 Recently, it was shown that FER-regulated ROP2 triggers a new mechanism of negative regulation  
381 in the case of rhizosphere microorganisms such as *Pseudomonas*<sup>76</sup>. Although not tested here,  
382 FER-ROP2-TORC1 signaling coupled to enhanced RH growth under low temperature (low-  
383 nutrients) might be linked to the root growth in specific soil conditions to select favorable  
384 microbiota in the soil. This pathway may integrate complex signals from soil nutrients and  
385 microbiota in the rhizosphere to plant root cell growth mechanism.

Low temperature perception by FER-TORC1 triggers root hair growth

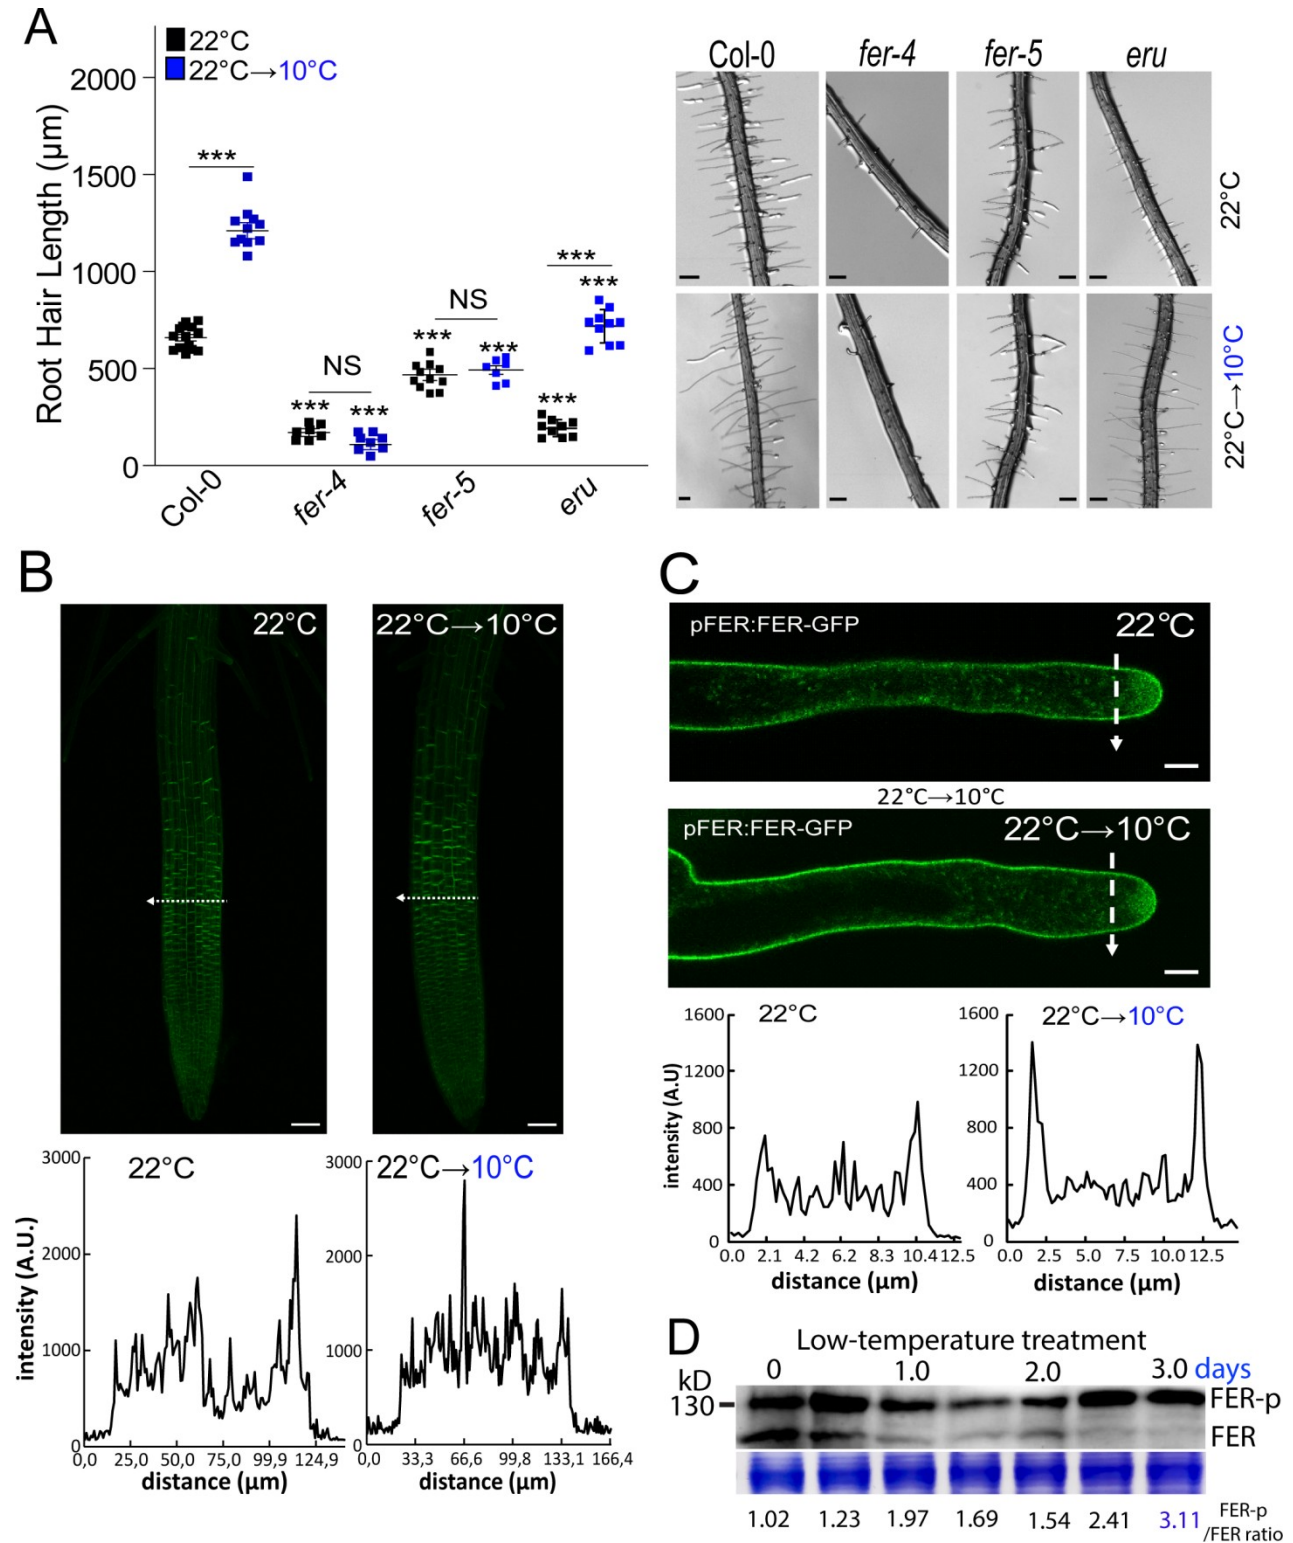

386

387 **Figure 1. High levels of FER in its phosphorylated form are required to trigger the low**  
 388 **temperature RH growth.**

## Low temperature perception by FER-TORC1 triggers root hair growth

389 **(A)** Scatterplot of RH length of Col-0, of *fer-4*, *fer-5*, and *eru* mutants grown at 22°C or at 10°C. RH  
390 growth is enhanced at low temperature in Wt Col-0 and *eru* mutant but not in the *fer-4* and *fer-5*  
391 mutants. Each point is the mean of the length of the 10 longest RHs identified in the maturation  
392 zone of a single root. Data are the mean  $\pm$  SD (N=10 roots), two-way ANOVA followed by a  
393 Tukey–Kramer test; (\*\*\*)  $p < 0.001$ , NS= non-significant. Results are representative of three  
394 independent experiments. Asterisks indicate significant differences between Col-0 and the  
395 corresponding genotype at the same temperature or between the same genotype at different  
396 temperatures. Representative images of each genotype are shown on the right. Scale bars= 300  
397  $\mu\text{m}$ .

398 **(B-C)** Increased level of FER in root cells after its activation by low temperature. **(B)** Confocal  
399 images of root apex of a fluorescent translational reporter line of FER (*pFER:FER-GFP*) at 22°C  
400 and after transfer from ambient to low temperature (22°C→10°C). On the Bottom: semi-  
401 quantitative evaluation of the GFP fluorescence intensity across the root tip at 22°C and after  
402 transfer from ambient to low temperature at the transition zone, indicated by a interrupted  
403 white line. Fluorescence intensity is expressed in arbitrary units (AU), N=4-6 roots. Results are  
404 representative of three independent experiments. Scale bars: 50  $\mu\text{m}$ .

405 **(C)** Confocal images of short root hairs of a fluorescent translational reporter line of FER  
406 (*pFER:FER-GFP*) at 22°C and after transfer from ambient to low temperature (22°C→10°C) On the  
407 bottom: semi-quantitative evaluation of the GFP fluorescence intensity across the subapical root  
408 hair zone at 22°C and after transfer from ambient to low temperature, indicated by a interrupted  
409 white line. Fluorescence intensity is expressed in arbitrary units (A.U.), N=6-8 roots, 8-11 root  
410 hairs. Results are representative of three independent experiments. Scale bars=5  $\mu\text{m}$ .

411 **(D)** Phosphorylation levels on FER (FER-p in *pFER:FER-GFP*) increases after 3 days at low  
412 temperature in roots. Protein loading control (Coomasie Blue) is indicated below. FER-p/FER  
413 ratios were analyzed by ImageJ.

Low temperature perception by FER-TORC1 triggers root hair growth

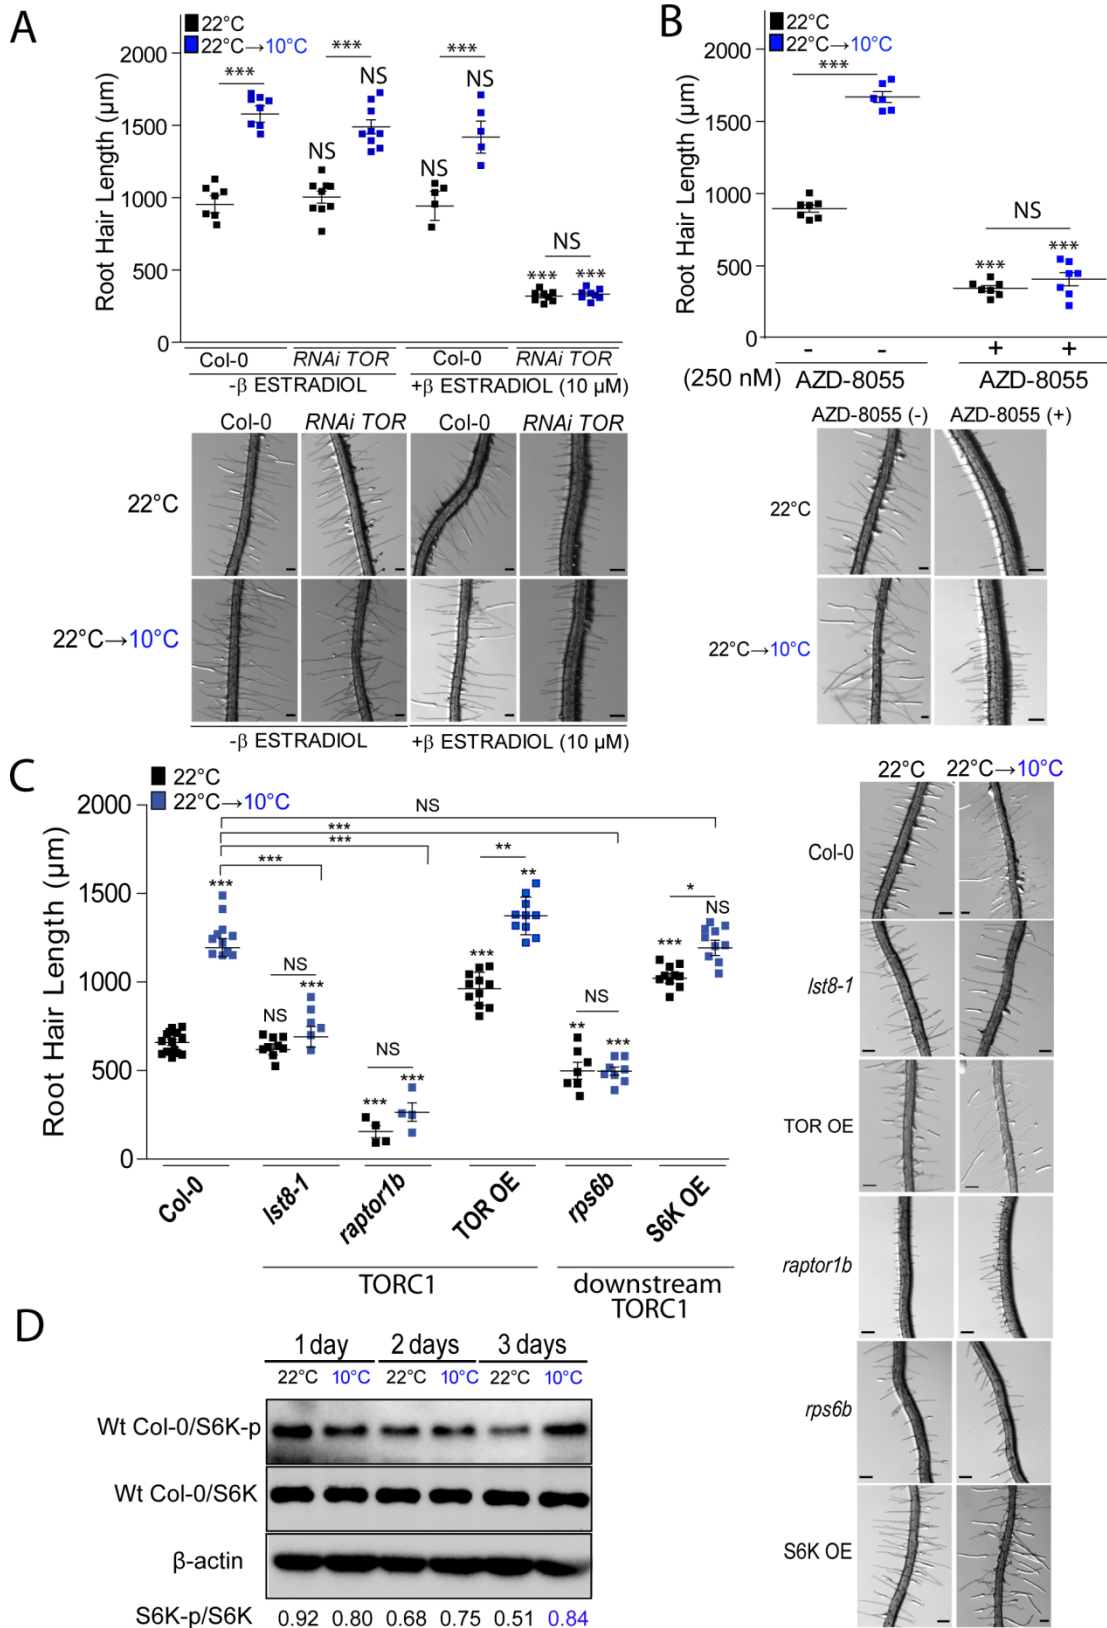

414  
415  
416

**Figure 2. TORC1 signaling pathway is required for low temperature triggered RH growth.**

## Low temperature perception by FER-TORC1 triggers root hair growth

417 **(A)** Scatterplot of RH length of Col-0 and *tor-es* line grown at 22°C or at 10°C. Differential growth  
418 of RH at low temperature is suppressed in the estradiol inducible *RNAi TOR* line. Each point is the  
419 mean of the length of the 10 longest RHs identified in the maturation zone of a single root. Data  
420 are the mean  $\pm$  SD (N=7-10 roots), two-way ANOVA followed by a Tukey–Kramer test; (\*\*\*)  
421  $p < 0.001$ , NS=non-significant. Results are representative of three independent experiments.  
422 Asterisks indicate significant differences between Col-0 and the corresponding genotype at the  
423 same temperature or between the same genotype at different temperatures. Representative  
424 images of each line are shown below. Scale bars=300  $\mu$ m.

425 **(B)** Differential growth of RH at low temperature is abolished in the Col-0 treated with 250 nM of  
426 TOR inhibitor, AZD-8055. Each point is the mean of the length of the 10 longest RHs identified in  
427 the maturation zone of a single root. Data are the mean  $\pm$  SD (N=7 roots), two-way ANOVA  
428 followed by a Tukey–Kramer test; (\*\*\*)  $p < 0.001$ , NS=non-significant. Results are representative  
429 of three independent experiments. Asterisks indicate significant differences between Col-0 and  
430 the corresponding genotype at the same temperature or between the same genotype at different  
431 temperatures. Representative images of each line are shown below. Scale bars=300  $\mu$ m.

432 **(C)** RH elongation of TORC1 and downstream TORC1 signaling pathway mutants under low  
433 temperature. Each point is the mean of the length of the 10 longest RHs identified in the  
434 maturation zone of a single root. Data are the mean  $\pm$  SD (N=7-12 roots), two-way ANOVA  
435 followed by a Tukey–Kramer test; (\*)  $p < 0.05$ , (\*\*)  $p < 0.01$ , (\*\*\*)  $p < 0.001$ , NS=non-significant.  
436 Results are representative of three independent experiments. Asterisks indicate significant  
437 differences between Col-0 and the corresponding genotype at the same temperature or between  
438 the same genotype at different temperatures. Representative images of each line are shown on  
439 the right. Scale bars=300  $\mu$ m.

440 **(D)** Analysis of the phosphorylation state of S6K (S6K-p/S6K ratio) in Col-0. A representative  
441 immunoblot is shown of a three biological replicates. S6K-p/S6K ratio was analyzed by ImageJ.

Low temperature perception by FER-TORC1 triggers root hair growth

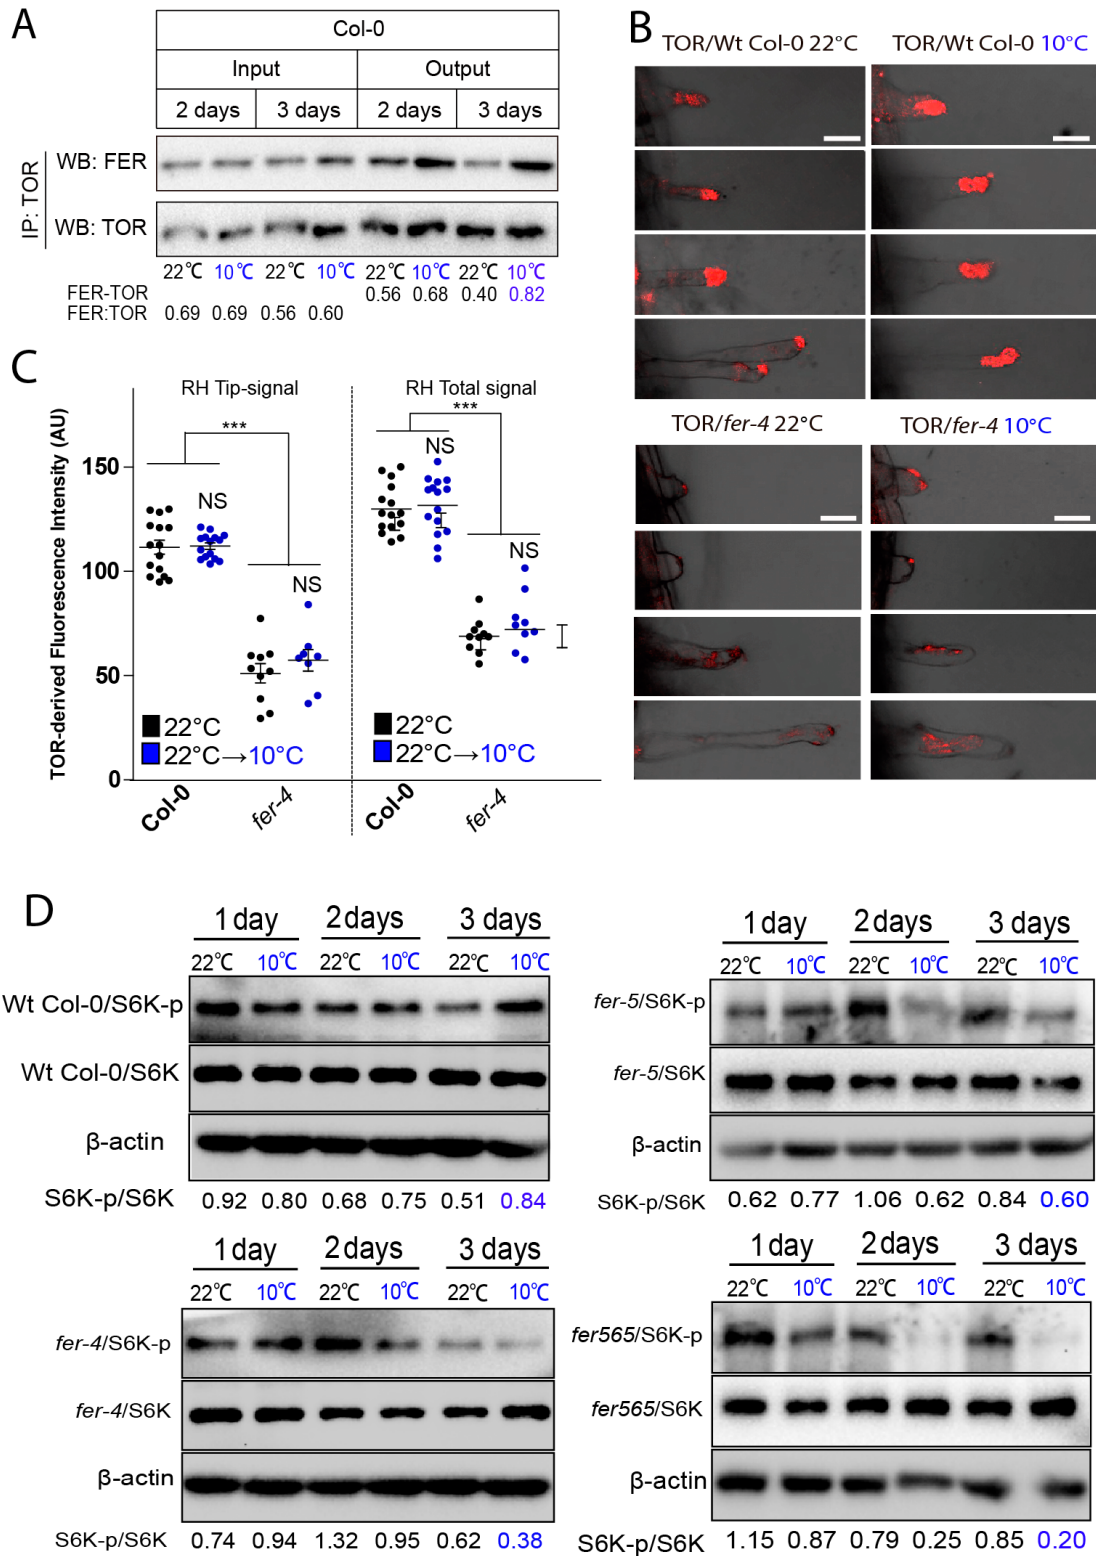

442  
443  
444  
445

**Figure 3. FER controls polar TOR localization and subsequent activation thus increasing phosphorylation of S6K under low temperature.**



## Low temperature perception by FER-TORC1 triggers root hair growth

- 446 **(A)** Enhanced FER-TOR interaction at low temperature in roots by Immunoprecipitation (IP). A  
447 representative experiment of three replicates is shown.
- 448 **(B)** Representative images showing TOR immunolocalization in RHs is FER-dependent. Scale  
449 bar=10  $\mu$ m.
- 450 **(C)** Apical and total TOR signal quantification in RHs showed in (B). A ROI at the RH tip of the  
451 fluorescent signal or at the entire RH TOR-derived fluorescent signal was measured. Fluorescence  
452 AU data are the mean  $\pm$  SD (N=10-15 root hairs), two-way ANOVA followed by a Tukey–Kramer  
453 test; (\*\*\*)  $p < 0.001$ , NS= non-significant. Results are representative of two independent  
454 experiments. Asterisks on the graph indicate significant differences between genotypes.
- 455 **(D)** Analysis of the phosphorylation state of S6K in Wt Col-0, *fer-4*, *fer-5*, and *FER*<sup>K565R</sup> mutants  
456 Arabidopsis roots. Phosphorylation of S6K (S6K-p) is enhanced at low temperature and requires  
457 FER active kinase. A representative immunoblot is shown of a three biological replicates. S6K-  
458 p/S6K ratio was analyzed by Image J. Wt Col-0 immunoblot is the same of the Figure 2D.

Low temperature perception by FER-TORC1 triggers root hair growth

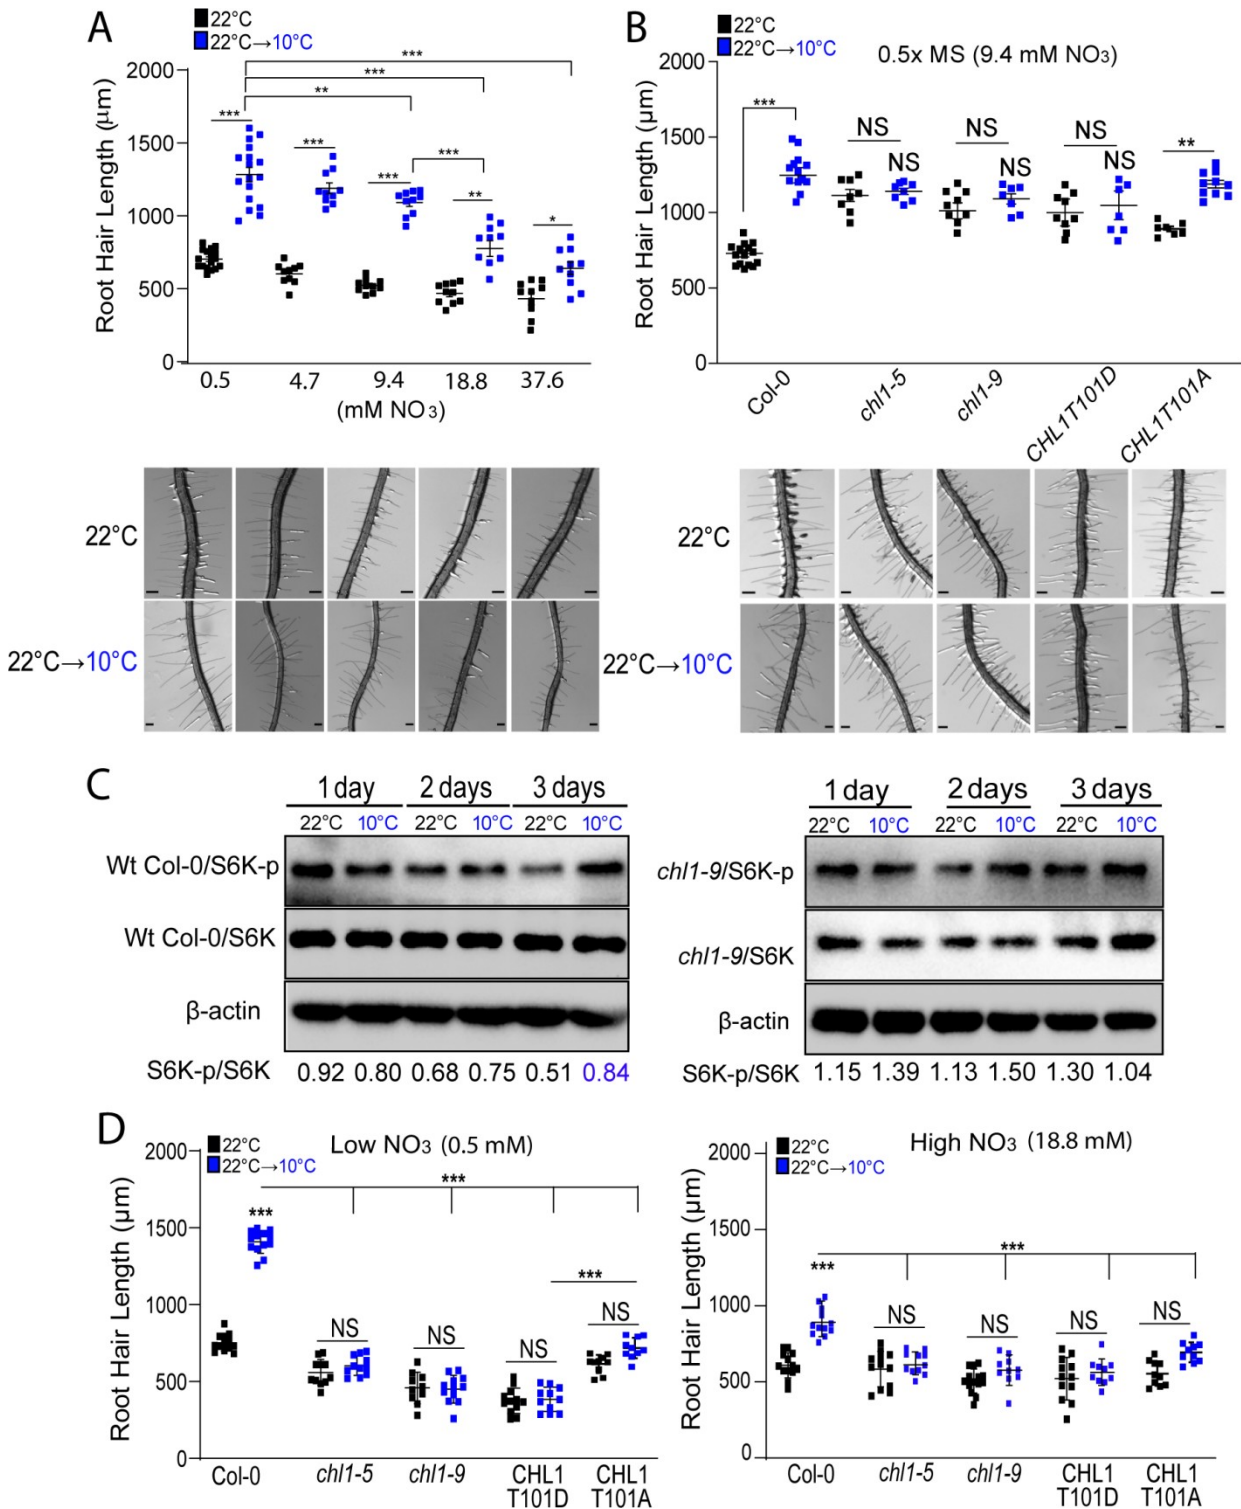

459  
460

461 **Figure 4. Nitrate acts as a RH growth signal perceived by NRT1.1 and triggered by TORC1**  
462 **pathway at low temperature growth.**

## Low temperature perception by FER-TORC1 triggers root hair growth

463 **(A)** High nitrate supplemented in M407 media (18.8 and 37.6 mM) partially suppresses low  
464 temperature enhanced RH growth in Wt Col-0 plants. Each point is the mean of the length of the  
465 10 longest RHs identified in the maturation zone of a single root. Data are the mean  $\pm$  SD (N=10  
466 roots), two-way ANOVA followed by a Tukey–Kramer test; (\*\*\*)  $p < 0.001$ . Results are  
467 representative of three independent experiments. Asterisks indicate significant differences  
468 between 0.5mM N concentration and every other N concentration at the same temperature or  
469 between the same N concentrations at different temperatures. Representative images of Col-0  
470 under the different nitrate concentrations are shown below. Scale bars=300  $\mu$ m.

471 **(B)** Low temperature RH growth is regulated by the nitrate sensor NRT1.1 (CHL1). Scatter-plot of  
472 RH length of Col-0 and NRT1.1 mutants in 0.5X MS (contains 9.4 mM Nitrates) grown at 22°C or  
473 10°C. Each point is the mean of the length of the 10 longest RHs identified in the maturation zone  
474 of a single root. Data are the mean  $\pm$  SD (N=10-15 roots), two-way ANOVA followed by a Tukey–  
475 Kramer test; (\*\*\*)  $p < 0.001$ , NS=non-significant. Results are representative of three independent  
476 experiments. Asterisks indicate significant differences between Col-0 and the corresponding  
477 genotype at the same temperature or between the same genotype at different temperatures.  
478 Representative images of each line are shown below. Scale bars=300  $\mu$ m.

479 **(C)** Analysis of the phosphorylation state of S6K in Wt Col-0 and *chl1-9* mutant roots. A  
480 representative immunoblot is shown of a three biological replicates. S6K-p/S6K ratio was  
481 analyzed by ImageJ. Wt Col-0 immunoblot is the same of the Figure 2D and Figure3D.

482 **(D)** RH growth responses under high and low nitrate (18.8 mM and 0.5 mM, respectively) in Wt  
483 Col-0, *chl1-5*, *chl1-9* mutants, and *CHL1*<sup>T101D</sup> grown at 22°C or 10°C. Each point is the mean of the  
484 length of the 10 longest RHs identified in the maturation zone of a single root. Data are the mean  
485  $\pm$  SD (N=10-15 roots), two-way ANOVA followed by a Tukey–Kramer test; (\*\*\*)  $p < 0.001$ , NS= non-  
486 significant. Results are representative of three independent experiments. Asterisks indicate  
487 significant differences between Col-0 and the corresponding genotype at the same temperature  
488 or between the same genotype at different temperatures.

Low temperature perception by FER-TORC1 triggers root hair growth

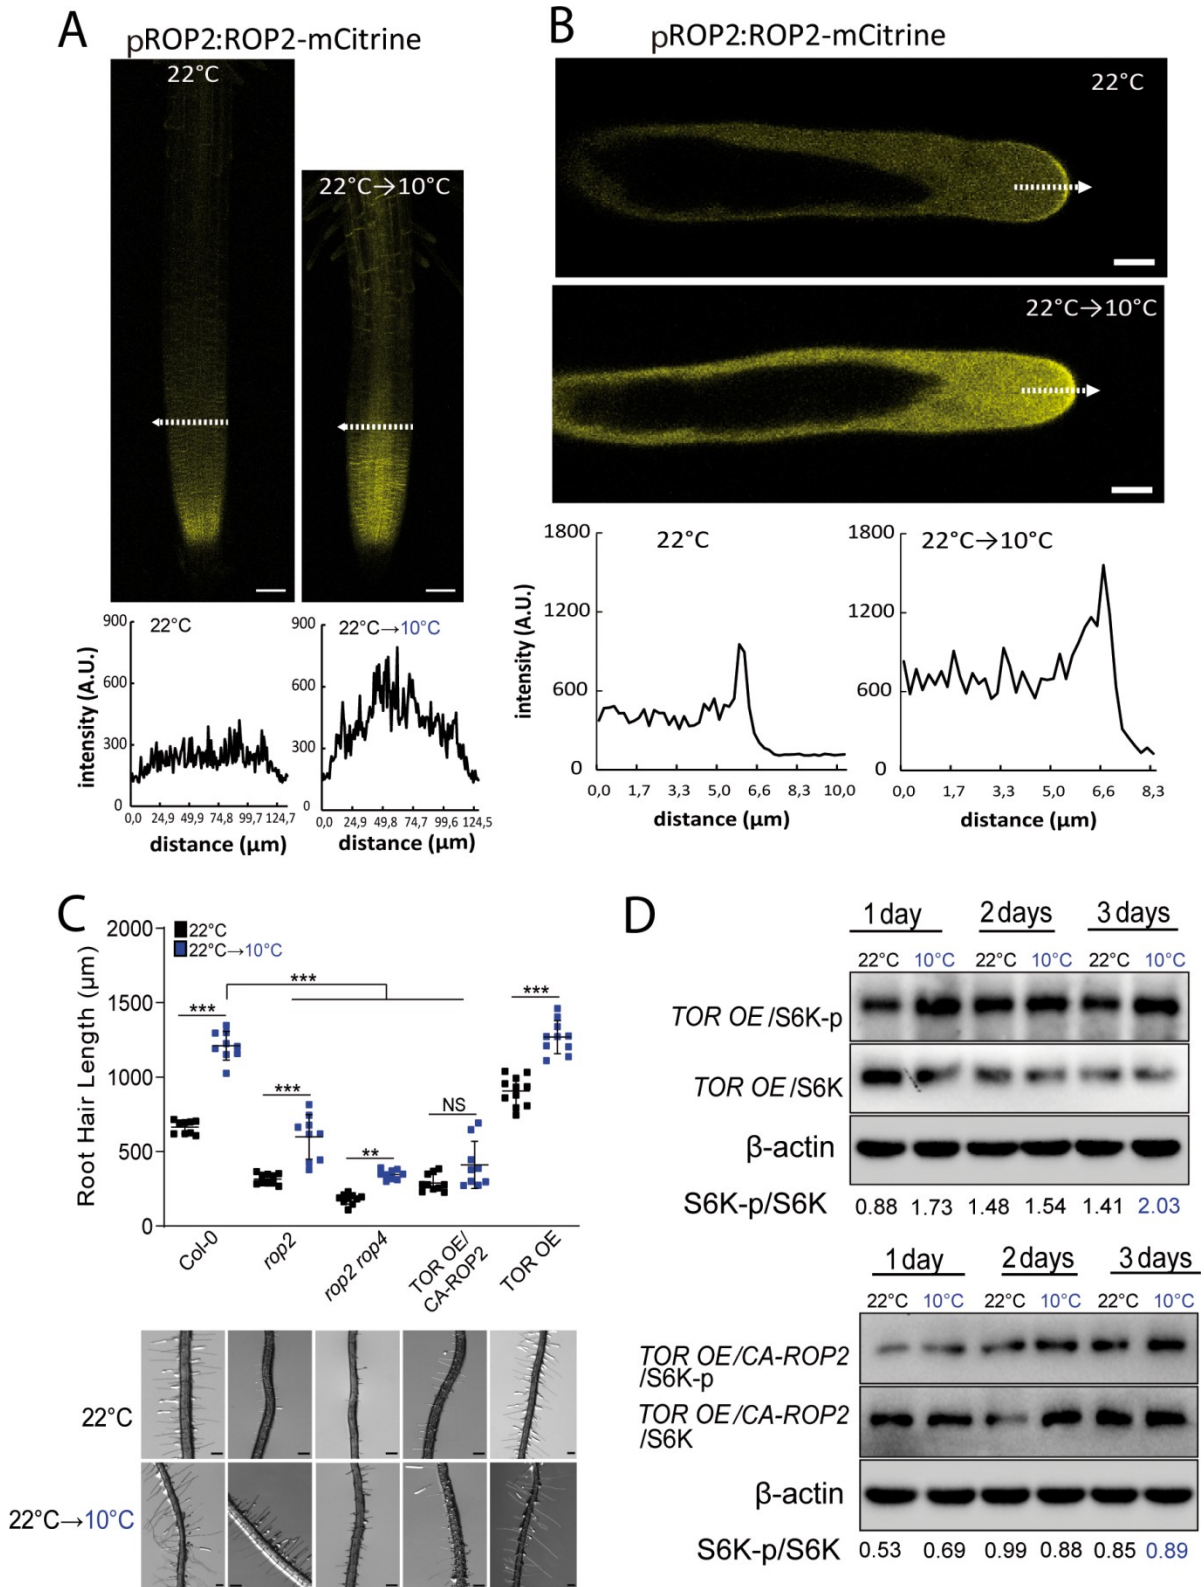

489  
490  
491

Figure 5. ROP2 is required to triggers RH growth at low temperature.

## Low temperature perception by FER-TORC1 triggers root hair growth

492 **(A-B)** Increased level of ROP2 after its activation by low temperature.

493 **(A)** Confocal images of root apex of a fluorescent translational reporter line of ROP2  
494 (*pROP2:ROP2-mCitrine*) at 22°C (A) and after transfer from ambient to low temperature (22°C→  
495 10°C). On the bottom: semi-quantitative evaluation of the mCitrine fluorescence intensity across  
496 the root tip at 22°C and after transfer from ambient to low temperature at the transition zone,  
497 indicated by a interrupted white line. Fluorescence intensity is expressed in arbitrary units (A.U.),  
498 N=4-5 roots. Results are representative of three independent experiments. Scale bars=50 µm.

499 **(B)** Increased level of ROP2 in the plasma membrane of RHs after its activation by low  
500 temperature. Confocal images of short RHs of a fluorescent translational reporter line of ROP2  
501 (*ROP2p:ROP2-mCitrine*) at 22°C and after transfer from ambient to low temperature (22°C→10°  
502 C). On the bottom: semi-quantitative evaluation of the mCitrine fluorescence intensity across the  
503 RH apex at 22°C and after transfer from ambient to low temperature, indicated by a interrupted  
504 white line. Fluorescence intensity is expressed in arbitrary units (A.U.), N=4-5 roots, 6-8 root  
505 hairs. Results are representative of three independent experiments. Scale bars=5 µm.

506 **(C)** ROP2 is required for RH at low temperature meanwhile *rop2*, *rop2 rop4* and *CA-ROP2/TOR OE*  
507 blocks RH growth. Each point is the mean of the length of the 10 longest RHs identified in a single  
508 root. Data are the mean ± SD (N=10-15 roots), two-way ANOVA followed by a Tukey–Kramer test;  
509 (\*\*)  $p < 0.01$ , (\*\*\*)  $p < 0.001$ . Results are representative of three independent experiments.  
510 Asterisks indicate significant differences. Representative images of each line are shown below.  
511 Scale bars=300 µm.

512 **(D)** Analysis of the phosphorylation state of S6K in *TOR OE* and *TOR OE /CA-ROP2* Arabidopsis  
513 roots. Phosphorylation of S6K (S6K-p) is enhanced in *TOR OE* and suppressed in *TOR OE/ROP2-CA*.  
514 A representative immunoblot is shown of a three biological replicates. S6K-p/S6K ratio was  
515 analyzed by Image J.

Low temperature perception by FER-TORC1 triggers root hair growth

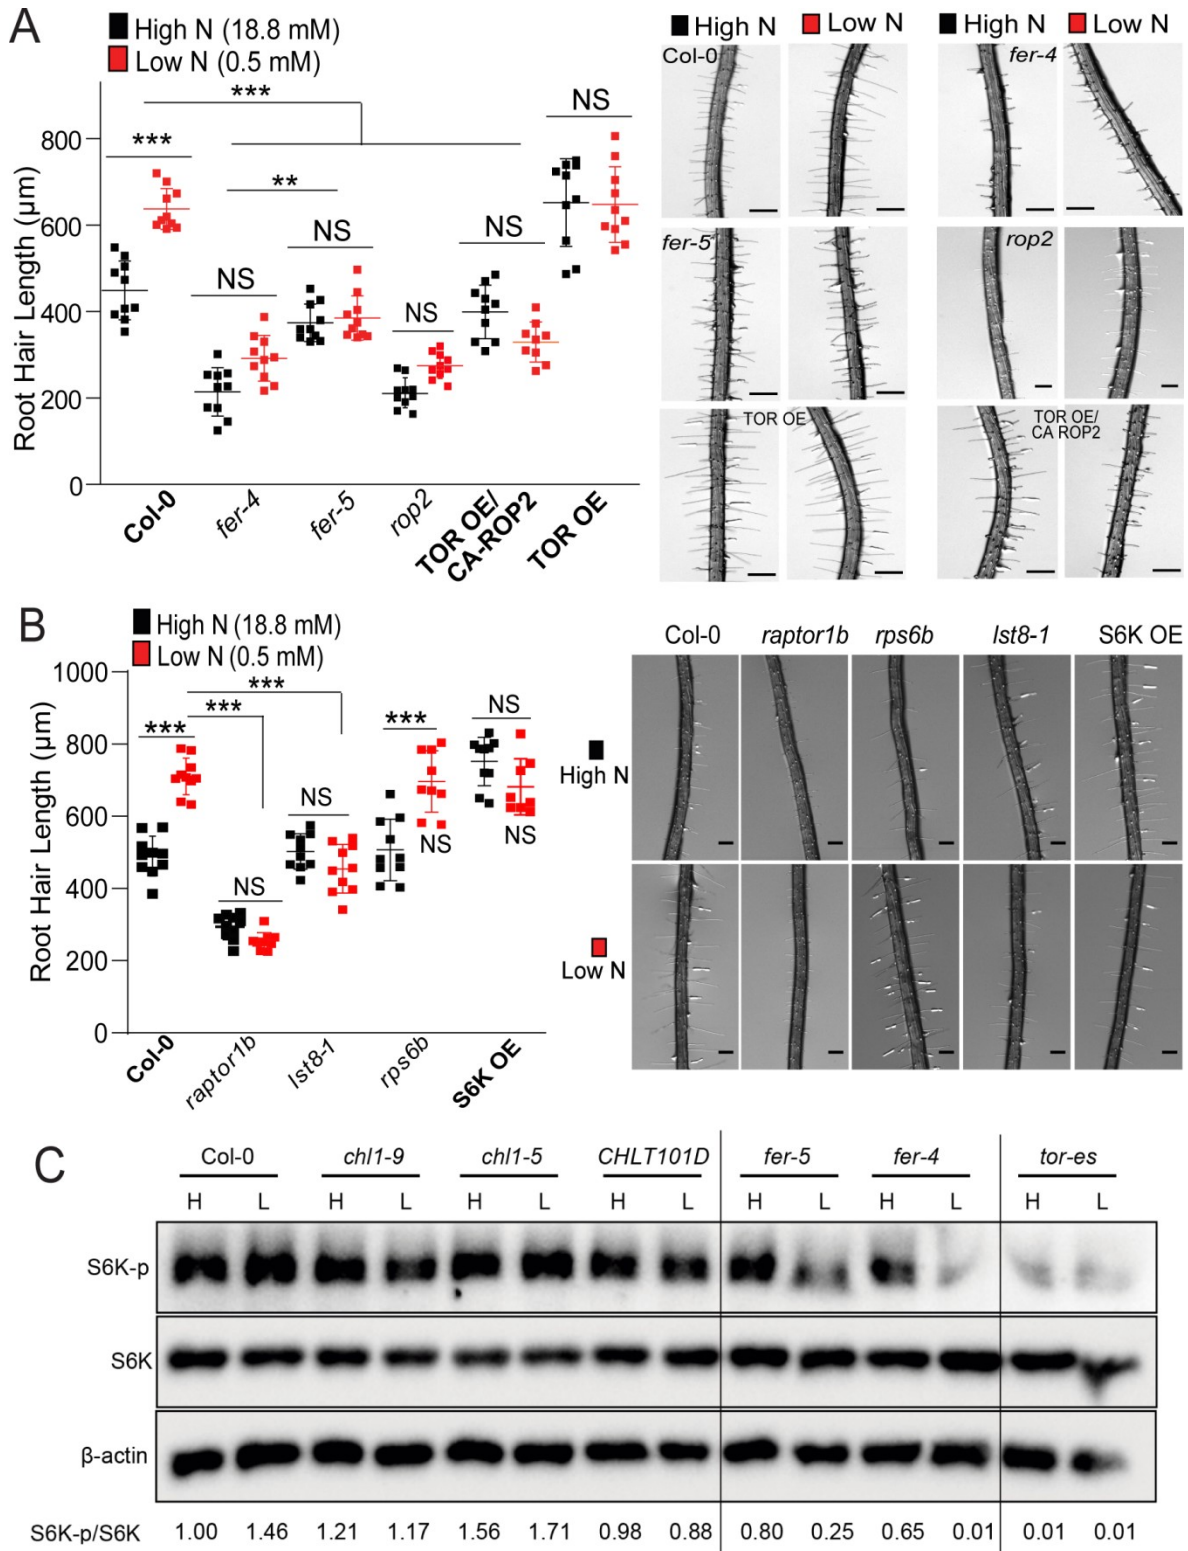

516

517

518 **Figure 6. Low nitrate perception relays in FER, ROP2 and TORC1 to trigger RH growth.**

### Low temperature perception by FER-TORC1 triggers root hair growth

519 **(A)** Scatterplot of RH length of Col-0, *fer-4*, *fer-5*, *rop2*, TOR OE/CA-ROP2 and TOR OE grown in  
520 low (0.5 mM) and high nitrate (18.8 mM) conditions in M407 media, both at 22°C. Each point is  
521 the mean of the length of the 10 longest RHs identified in the maturation zone of a single root.  
522 Data are the mean  $\pm$  SD (N=10 roots), two-way ANOVA followed by a Tukey–Kramer test; (\*\*)  
523  $p < 0.01$ , (\*\*\*)  $p < 0.001$ , NS=non-significant. Results are representative of three independent  
524 experiments. Asterisks indicate significant differences between the same genotype at different N  
525 concentration or between different genotypes at the same N concentration. Representative  
526 images of each line are shown on the right. Scale bars=300  $\mu$ m.

527 **(B)** Scatterplot of RH length of Col-0, *raptor1b*, *lst8-1*, *rps6b* and S6K OE mutants grown in low  
528 and high N conditions. Each point is the mean of the length of the 10 longest RHs identified in the  
529 maturation zone of a single root. Data are the mean  $\pm$  SD (N=10 roots), two-way ANOVA followed  
530 by a Tukey–Kramer test; (\*\*\*)  $p < 0.001$ , NS=non-significant. Results are representative of three  
531 independent experiments. Asterisks indicate significant differences between the same genotype  
532 at different N concentration or between different genotypes at the same N concentration.

533 **(C)** Analysis of the phosphorylation state of S6K in Wt Col-0, in NRT1.1 mutants (*chl1-9*, *chl1-5*,  
534 CHLT101D), and in FER mutants (*fer-4*, *fer-5*, and *FER<sup>K565R</sup>*). A representative immunoblot is shown  
535 of a three biological replicates. S6K-p/S6K ratio was analyzed by Image J.

Low temperature perception by FER-TORC1 triggers root hair growth

## 536 **Experimental Procedures**

537  
538 **Plant Material and Growth Conditions.** *A. thaliana* Col-0 ecotype was used as a wild-type plant.  
539 To test the low and high nitrate response a 0.5X M407 medium without N, P nor K (M407,  
540 PhytoTechnology Laboratories, <https://www.phytotechlab.com/>) supplemented with 0.8% plant  
541 agar (Duchefa, Netherlands); 1.17mM MES, 0.625 mM KH<sub>2</sub>PO<sub>4</sub> monobasic and 0.5mM KNO<sub>3</sub> (low  
542 nitrate medium) 9.4mM, 18.8 mM and 37.6 mM KNO<sub>3</sub> (high nitrate medium) was used. Media  
543 composition is detailed in **Table S1**. Plants were grown in the above media in continuous light  
544 (120 μmol.sec<sup>-1</sup>.m<sup>-2</sup>) either: 8 days at 22°C in the case of *tor-es* line assay, 8 days at 22°C for  
545 nitrate response assay or 5 days at 22°C + 3 days at 10°C for the low temperature and nitrate  
546 response combination assay. For the rest of the low temperature experiments plants were grown  
547 on regular 0.5X MS agar plates. For the imaging of fluorescence intensity distribution in root tips  
548 and RH, seedlings were grown for 3 days at 22°C + 3-4 days at 10°C. All mutants and transgenic  
549 lines are listed in **Table S2**. *chl1-5*, *chl1-9* and T101D mutants were kindly donated by Dr Yi-Fang  
550 Tsay. *tor-es* was kindly donated by Dr Ezequiel Petrillo, *lst8-1*, *rps6b*, *raptor1b* and overexpressing  
551 line S6K1 (S6K OE) kindly donated by Dr Elina Welchen and TOR OE and TOR OE/CA-ROP2 kindly  
552 donated by Dr. Lyubov Ryabova.

553  
554 **Pharmacological Treatments.** For all experiments, plants were grown first on solid 0.5X MS  
555 medium at 22°C for 5 days in continuous light. According to the specific treatment plants were  
556 transferred to plates containing regular solid 0.5X MS supplemented with 100nM IAA (auxin  
557 treatment), 250 nM AZD-8055 (TOR inhibition) or 10 μM β-estradiol (*tor-es* line low temperature  
558 treatment) and grown at 22°C for 5 days + 3 days at 10°C in continuous light. RH phenotype was  
559 quantified after each 3 days span. For nitrate response treatment plants were transferred to  
560 plates containing low or high nitrate solid media supplemented with 10 μM β-estradiol (*tor-es*  
561 line), grown at 22°C for 3 days in continuous light and RH phenotype quantified.

562  
563 **Root hair phenotype.** Seeds were surface sterilized and stratified in darkness for 3 days at 4°C.  
564 Then grown *in vitro* on a specific condition and medium in a plant growth chamber in continuous  
565 light (120 μmol.sec<sup>-1</sup>.m<sup>-2</sup>) at 22°C and/or 10°C. The quantitative analyses of RH phenotypes of Col-  
566 0 and transgenic lines were made the last day of the growth conditions described in the two  
567 previous sections. In the case of low temperature treatment, the measurements were done after  
568 5 days at 22°C and after 3 days at 10°C. For that purpose, 10 fully elongated RH from the  
569 maturation zone were measured per root under the same conditions from each treatment and  
570 control. Images were captured using an Olympus SZX7 Zoom Stereo Microscope (Olympus, Japan)  
571 equipped with a Q-Colors digital camera and Q Capture Pro 7 software (Olympus, Japan). Results  
572 were expressed as the mean ± SD using the GraphPad Prism 8.0.1 (USA) statistical analysis



## Low temperature perception by FER-TORC1 triggers root hair growth

573 software. Results are representative of three independent experiments, each involving 7–20  
574 roots.

575  
576 **Confocal Microscopy.** For measurements of fluorescence intensity distributions after cold stress  
577 (22°C→10°C) in root tips and root hairs of *pFER::FER-GFP* and *pROP2::ROP2-mCitrine* lines  
578 confocal laser scanning microscopy Zeiss LSM 710 (Carl Zeiss, Germany) was used. For image  
579 acquisition, 10x/0.3 NA EC Plan-Neofluar objective for root tips, and 40x/1.4 Oil DIC Plan-  
580 Apochromat objective for root hairs were used. GFP signal was excited with 488 nm argon laser  
581 at 4% laser power intensity and emission band of 493-549 nm. mCitrine signal was excited with  
582 514 nm argon laser at 4% laser power intensity and emission band 519-583 nm. Fluorescence  
583 intensity measurements (in A.U.) were generated using Zen Black 2011 software (Carl Zeiss,  
584 Germany) and graphically edited in Microsoft Excel. Results are representative of three  
585 independent experiments, each involving 1–2 roots and 1 to 4 hairs per root.

586  
587 **Co-IP assay.** For Co-IP assays using A/G agarose and an anti-TOR antibody<sup>32</sup>, 30 µL of A/G beads  
588 (Thermo Fisher Scientific Inc., 20421) was resuspended and washed three times using NEB buffer  
589 (20 mM HEPES [pH 7.5], 40 mM KCl, 5 mM MgCl<sub>2</sub>) before adding 8 µL of anti-TOR antibody or  
590 preimmune serum as a negative control<sup>32</sup> in a total volume of 500 µL of NEB buffer, followed by  
591 incubation for 4 h at 4 °C. Col-0 seedlings were first grown at 22 °C for 5 days then transferred to  
592 22 °C or 10 °C for 2 days or 3 days. For protein extraction from plants, the collected materials  
593 were ground to a fine powder in liquid nitrogen and solubilized with NEB-T buffer (20 mM HEPES  
594 [pH 7.5], 40 mM KCl, 5 mM MgCl<sub>2</sub>, 0.5% Triton X-100) containing 1 × protease inhibitor cocktail  
595 (Thermo Fisher Scientific Inc., 78430) and 1 × phosphatase inhibitor (Thermo Fisher Scientific Inc.,  
596 78420) and incubated for 1 h on the ice. The extracts were centrifuged at 16,000 g at 4 °C for 15  
597 min, and the resultant supernatant was incubated with prepared antibody-beads from the above  
598 step. After overnight incubation at 4°C with rotation, the agarose beads were washed five times  
599 with the NEB buffer and eluted with elution buffer (0.2 M glycine, 0.5% Triton X-100, pH 7.5).  
600 Anti-FER and anti-TOR antibodies<sup>30</sup> were used for immunoblotting to detect the  
601 immunoprecipitates.

602  
603 **TOR immunolocalization.** Col-0 and *fer-4* seedlings were first grown at 22 °C for 5 days before  
604 transferred to 22 °C or 10 °C for 3 days. Then seedlings were collected and incubated for 10 min  
605 under vacuum (0.05 MPa) in phosphate-buffered saline (PBS) containing 4% paraformaldehyde  
606 and 0.1% Triton X-100. Seedlings were washed gently three times (10 min for each wash) in PBS  
607 and then the cell wall was digested in 2% Driselase (Sigma, D8037) in PBS for 18 min at 37 °C and  
608 washed five times with PBS. The permeability of the seedlings was increased by incubating them  
609 in 3% IGEPAL CA-630 (Sigma, 18896) and 10% DMSO in PBS for 18 min, followed by washed three  
610 times with PBS. Seedlings were incubated in 2% bovine serum albumin (BSA) (Ameresco, 0332) in

## Low temperature perception by FER-TORC1 triggers root hair growth

611 PBS for 1.5 h and then incubated with primary TOR antibody<sup>32</sup> (antibody diluted 1:600 in 2% BSA)  
612 for overnight at 4°C. The seedlings were washed with PBS for five times. Fluorophore-labeled  
613 secondary antibody (goat–mouse secondary antibody, diluted 1:600 in 2% BSA) was incubated  
614 with the samples at 37°C for 5 h in the dark. Seedlings were washed five times with PBS before  
615 observation. Fluorescent signal detection and documentation were performed using a Nikon  
616 confocal laser scanning microscope with a 560-nm band-pass filter for IF555 detection.

617  
618 **S6K-p/S6K immunoblotting detection.** For immunological detection of S6K-p and S6K1/2, total  
619 soluble proteins were extracted from 50 mg of plant materials grown as indicated previously with  
620 100 µL 2 × Laemmli buffer supplemented with 1% Phosphatase Inhibitor Cocktail 2 (Thermo  
621 Fisher Scientific Inc., 78430). Proteins were denatured for 10 min at 95°C and separated on 10%  
622 or 8% SDS-PAGE. Rabbit AtTOR polyclonal antibodies (Abiocode, R2854-2), rabbit polyclonal  
623 S6K1/2 antibodies (Agrisera, AS121855), and S6K1-p (phospho T449) antibody (Abcam,  
624 ab207399) and ACTIN antibody (Abmart, M20009) were used for immunoblotting.

625  
626 **Quantitative PCR (qPCR).** Total root RNA was extracted from plantlets grown *in vitro* at 22 °C and  
627 10 °C using the RNeasy®Plant Mini Kit (QIAGEN, Germany). One microgram of total RNA was  
628 reverse transcribed using an oligo(dT)<sub>20</sub> primer and the Super Script™ IV RT (Invitrogen,USA)  
629 according to the manufacturer's instructions. cDNA was diluted 20-fold before PCR. qPCR was  
630 performed on a LightCycler®480 Instrument II (Roche, USA) using 2 µL of 5X HOT  
631 FIREPol®EvaGreen® qPCR Mix Plus(no ROX) (Solis BioDyne, Estonia), 2 µL of cDNA, and 0.25 µM of  
632 each primer in a total volume of 10 µL per reaction. ACT2 (AT3G18780) gene was used as  
633 reference for normalization of gene expression levels (ACT2 primers, F:  
634 GGTAACATTGTGCTCAGTGGTGG R: CTCGGCCTTGGAGATCCACATC; TOR primers, F:  
635 GAAGATGAAGATCCCGCTGA R: GCATCTCCAAGCATATTTACAGC<sup>44</sup>). The cycling conditions were: 95  
636 °C for 12 min., 35 cycles of 95°C for 15 sec., 60°C for 1 min. and finally a melting curve from 60°C  
637 to 95 °C (0.05°/sec). Data were analyzed using the  $\Delta\Delta C_t$  method<sup>93</sup> and LightCycler®480 Software,  
638 version 1.5 (Roche). Two independent experiments with three biological and three technical  
639 replicates per experiment, were performed.

Low temperature perception by FER-TORC1 triggers root hair growth

640 **Acknowledgements**

641 We would like to thank Elina Welchen, Ezequiel Petrillo, Yi-Fang Tsay, Kriss Vissenberg for the  
642 seed lines. We thank NASC (Ohio State University) for providing T-DNA lines seed lines. J.M.E. is  
643 investigator of the National Research Council (CONICET) from Argentina. M.I. is supported by  
644 ANID FONDECYT POSTDOCTORADO [grant 3220138]. This work was supported by grants Natural  
645 Science Foundation of China (NSFC-32001974 and NSFC-31871396) to F.Y. and from ANPCyT  
646 (PICT2017-0066, and PICT2019-0015), by ANID – Programa Iniciativa Científica Milenio  
647 ICN17\_022, NCN2021\_010 and Fondo Nacional de Desarrollo Científico y Tecnológico [1200010]  
648 to J.M.E., by the Deutsche Forschungsgemeinschaft (DFG; GR4559\_4-1, GR4559\_5-1, EXC-2048/1  
649 project ID 390686111) to G.G., and by the Czech Science Foundation GAČR (project Nr. 19-  
650 18675S) to J.Š.

651

652

653 **Author Contribution**

654 J.M.P performed most of the experiments, analysed the data and helped in the writing process of  
655 the manuscript. L.S. performed the S6K-p determinations, IP of TOR-FER and immunolocalization  
656 assay of TOR. L.K., M.O. and J.Š. provided live cell imaging data on FER and ROP2. V.B.G., J.M.P.,  
657 T.U.I., M.A.I., S-Z., Y.S., R.A.G., M.S., L.A.R., J.M.A., G.G., J.S. helped in the data analysis and  
658 writing process of the manuscript. F.Y. designed research and analysed part of the data and  
659 J.M.E. designed research, analysed the data, supervised the project, and wrote the paper. All  
660 authors commented on the results and the manuscript. This manuscript has not been published  
661 and is not under consideration for publication elsewhere. All the authors have read the  
662 manuscript and have approved this submission.

663

664

665 **Competing financial interest**

666 The authors declare no competing financial interests. Correspondence and requests for materials  
667 should be addressed to F.Y. ([feng\\_yu@hnu.edu.cn](mailto:feng_yu@hnu.edu.cn)) and J.M.E. (Email: [jestevez@leloir.org.ar](mailto:jestevez@leloir.org.ar)).

## Low temperature perception by FER-TORC1 triggers root hair growth

### 668 REFERENCES

- 669
- 670 1. Šamaj, J., Müller, J., Beck, M., Böhm, N., and Menzel, D. (2006). Vesicular trafficking,  
671 cytoskeleton and signalling in root hairs and pollen tubes. *Trends Plant Sci.* *11*, 594–600.
  - 672 2. Pascale, A., Proietti, S., Pantelides, I.S., and Stringlis, I.A. (2019). Modulation of the Root  
673 Microbiome by Plant Molecules: The Basis for Targeted Disease Suppression and Plant  
674 Growth Promotion. *Front. Plant Sci.* *10*.
  - 675 3. Vijayakumar, P., Datta, S., and Dolan, L. (2016). ROOT HAIR DEFECTIVE SIX-LIKE4 (RSL4)  
676 promotes root hair elongation by transcriptionally regulating the expression of genes  
677 required for cell growth. *New Phytol.* *212*, 944–953.
  - 678 4. Kuběňová, L., Tichá, M., Šamaj, J., and Ovečka, M. (2022). ROOT HAIR DEFECTIVE 2  
679 vesicular delivery to the apical plasma membrane domain during Arabidopsis root hair  
680 development. *Plant Physiol.*, kiab595.
  - 681 5. Zhu, S., Estévez, J.M., Liao, H., Zhu, Y., Yang, T., Li, C., Wang, Y., Li, L., Liu, X., Pacheco, J.M.,  
682 et al. (2020). The RALF1–FERONIA Complex Phosphorylates eIF4E1 to Promote Protein  
683 Synthesis and Polar Root Hair Growth. *Mol. Plant* *13*, 698–716.
  - 684 6. Stanley, C.E., Shrivastava, J., Brugman, R., Heinzelmann, E., van Swaay, D., and Grossmann,  
685 G. (2018). Dual-flow-RootChip reveals local adaptations of roots towards environmental  
686 asymmetry at the physiological and genetic levels. *New Phytol.* *217*, 1357–1369.
  - 687 7. Yi, K., Menand, B., Bell, E., and Dolan, L. (2010). A basic helix-loop-helix transcription factor  
688 controls cell growth and size in root hairs. *Nat. Genet.* *42*, 264–267.
  - 689 8. Datta, S., Prescott, H., and Dolan, L. (2015). Intensity of a pulse of RSL4 transcription factor  
690 synthesis determines Arabidopsis root hair cell size. *Nat. Plants* *1*, 1–6.
  - 691 9. Moison, M., Pacheco, J.M., Lucero, L., Fonouni-Farde, C., Rodríguez-Melo, J., Mansilla, N.,  
692 Christ, A., Bazin, J., Benhamed, M., Ibañez, F., et al. (2021). The lncRNA APOLO interacts  
693 with the transcription factor WRKY42 to trigger root hair cell expansion in response to  
694 cold. *Mol. Plant* *14*, 937–948.
  - 695 10. Singha, S., Townsend, E.C. and Oberly, G.H. (1985). Mineral nutrient status of crabapple  
696 and pear shoots cultured in vitro on varying commercial agars. *J. Am. Soc. Hortic. Sci.* *110*,  
697 407-411.
  - 698 11. Nonami, H., and Boyer, J.S. (1989). Turgor and Growth at Low Water Potentials. *Plant*  
699 *Physiol.* *89*, 798–804.
  - 700 12. Ghashghaie, J., Brenckmann, F., and Saugier, B. (1991). Effects of agar concentration on  
701 water status and growth of rose plants cultured in vitro. *Physiol. Plant.* *82*, 73–78.
  - 702 13. Buah, J.N., Kawamitsu, Y., Sato, S., and Murayama, S. (1999). Effects of Different Types and  
703 Concentrations of Gelling Agents on the Physical and Chemical Properties of Media and the  
704 Growth of Banana ( *Musa spp.*) in Vitro. *Plant Prod. Sci.* *2*, 138–145.
  - 705 14. Pacheco, J.M., Mansilla, N., Moison, M., Lucero, L., Gabarain, V.B., Ariel, F., and Estevez,  
706 J.M. (2021). The lncRNA APOLO and the transcription factor WRKY42 target common cell  
707 wall EXTENSIN encoding genes to trigger root hair cell elongation. *Plant Signal. Behav.* *16*,  
708 1920191.
  - 709 15. Pacheco, J.M., Ranocha, P., Kasulin, L., Fusari, C.M., Servi, L., Aptekmann, A.A., Gabarain,  
710 V.B., Peralta, J.M., Borassi, C., Marzol, E., et al. (2022). Apoplastic class III peroxidases

## Low temperature perception by FER-TORC1 triggers root hair growth

- 711 PRX62 and PRX69 promote Arabidopsis root hair growth at low temperature. *Nat.*  
712 *Commun.* *13*, 1310.
- 713 16. Xiong, Y., and Sheen, J. (2014). The role of target of rapamycin signaling networks in plant  
714 growth and metabolism. *Plant Physiol.* *164*, 499–512.
- 715 17. Dobrenel, T., Mancera-Martínez, E., Forzani, C., Azzopardi, M., Davanture, M., Moreau, M.,  
716 Schepetilnikov, M., Chicher, J., Langella, O., Zivy, M., et al. (2016). The arabidopsis TOR  
717 kinase specifically regulates the expression of nuclear genes coding for plastidic ribosomal  
718 proteins and the phosphorylation of the cytosolic ribosomal protein S6. *Front. Plant Sci.* *7*,  
719 1–16.
- 720 18. Saxton, R.A., and Sabatini, D.M. (2017). mTOR Signaling in Growth, Metabolism, and  
721 Disease. *Cell* *168*, 960–976.
- 722 19. Tatebe, H., and Shiozaki, K. (2017). Evolutionary Conservation of the Components in the  
723 TOR Signaling Pathways. *Biomolecules* *7*, 1–17.
- 724 20. Van Leene, J., Han, C., Gadeyne, A., Eeckhout, D., Matthijs, C., Cannoot, B., De Winne, N.,  
725 Persiau, G., Van De Slijke, E., Van de Cotte, B., et al. (2019). Capturing the phosphorylation  
726 and protein interaction landscape of the plant TOR kinase. *Nat. Plants* *5*, 316–327.
- 727 21. Menand, B., Desnos, T., Nussaume, L., Bergert, F., Bouchez, D., Meyer, C., and Robaglia, C.  
728 (2002). Expression and disruption of the Arabidopsis TOR (target of rapamycin) gene. *Proc.*  
729 *Natl. Acad. Sci. U. S. A.* *99*, 6422–6427.
- 730 22. Anderson, G.H., Veit, B., and Hanson, M.R. (2005). The Arabidopsis AtRaptor genes are  
731 essential for post-embryonic plant growth. *BMC Biol.* *3*, 1–12.
- 732 23. Deprost, D., Truong, H.N., Robaglia, C., and Meyer, C. (2005). An Arabidopsis homolog of  
733 RAPTOR/KOG1 is essential for early embryo development. *Biochem. Biophys. Res.*  
734 *Commun.* *326*, 844–850.
- 735 24. Mahfouz, M.M., Kim, S., Delauney, A.J., and Verma, D.P.S. (2006). Arabidopsis TARGET of  
736 RAPAMYCIN interacts with RAPTOR, which regulates the activity of S6 kinase in response to  
737 osmotic stress signals. *Plant Cell* *18*, 477–490.
- 738 25. Yang, H., Rudge, D.G., Koos, J.D., Vaidialingam, B., Yang, H.J., and Pavletich, N.P. (2013).  
739 MTOR kinase structure, mechanism and regulation. *Nature* *497*, 217–223.
- 740 26. Rexin, D., Meyer, C., Robaglia, C., and Veit, B. (2015). TOR signalling in plants. *Biochem. J.*  
741 *470*, 1–14.
- 742 27. Salem, M.A., Li, Y., Wiszniewski, A., and Giavalisco, P. (2017). Regulatory-associated protein  
743 of TOR (RAPTOR) alters the hormonal and metabolic composition of Arabidopsis seeds,  
744 controlling seed morphology, viability and germination potential. *Plant J.* *92*, 525–545.
- 745 28. Moreau, M., Azzopardi, M., Clément, G., Dobrenel, T., Marchive, C., Renne, C., Martin-  
746 Magniette, M.L., Taconnat, L., Renou, J.P., Robaglia, C., et al. (2012). Mutations in the  
747 Arabidopsis homolog of LST8/GβL, a partner of the target of Rapamycin kinase, impair  
748 plant growth, flowering, and metabolic adaptation to long days. *Plant Cell* *24*, 463–481.
- 749 29. McCready, K., Spencer, V., and Kim, M. (2020). The Importance of TOR Kinase in Plant  
750 Development. *Front. Plant Sci.* *11*, 1–7.
- 751 30. Henriques, R., Magyar, Z., Monardes, A., Khan, S., Zalejski, C., Orellana, J., Szabados, L., De  
752 La Torre, C., Koncz, C., and Bögre, L. (2010). Arabidopsis S6 kinase mutants display  
753 chromosome instability and altered RBR1-E2F pathway activity. *EMBO J.* *29*, 2979–2993.

## Low temperature perception by FER-TORC1 triggers root hair growth

- 754 31. Ahn, C.S., Han, J.A., Lee, H.S., Lee, S., and Pai, H.S. (2011). The PP2A regulatory subunit  
755 Tap46, a component of the TOR signaling pathway, modulates growth and metabolism in  
756 plants. *Plant Cell* 23, 185–209.
- 757 32. Xiong, Y., and Sheen, J. (2012). Rapamycin and glucose-target of rapamycin (TOR) protein  
758 signaling in plants. *J. Biol. Chem.* 287, 2836–2842.
- 759 33. Patrick, R.M., Lee, J.C.H., Teetsel, J.R.J., Yang, S.H., Choy, G.S., and Browning, K.S. (2018).  
760 Discovery and characterization of conserved binding of eIF4E 1 (CBE1), a eukaryotic  
761 translation initiation factor 4E– binding plant protein. *J. Biol. Chem.* 293, 17240–17247.
- 762 34. Xiong, Y., and Sheen, J. (2015). Novel links in the plant TOR kinase signaling network. *Curr.*  
763 *Opin. Plant Biol.* 28, 83–91.
- 764 35. Dobrenel, T., Caldana, C., Hanson, J., Robaglia, C., Vincentz, M., Veit, B., and Meyer, C.  
765 (2016). TOR Signaling and Nutrient Sensing. *Annu. Rev. Plant Biol.* 67, 261–285.
- 766 36. González, A., and Hall, M.N. (2017). Nutrient sensing and TOR signaling in yeast and  
767 mammals. *EMBO J.* 36, 397–408.
- 768 37. Bakshi, A., Moin, M., Madhav, M.S., and Kirti, P.B. (2019). Target of rapamycin, a master  
769 regulator of multiple signalling pathways and a potential candidate gene for crop  
770 improvement. *Plant Biol.* 21, 190–205.
- 771 38. Pacheco, J.M., Canal, M.V., Pereyra, C.M., Welchen, E., Martínez-Noël, G.M.A., and  
772 Estevez, J.M. (2021). The tip of the iceberg: emerging roles of TORC1, and its regulatory  
773 functions in plant cells. *J. Exp. Bot.* 72, 4085–4101.
- 774 39. Dong, Y., Silbermann, M., Speiser, A., Forieri, I., Linster, E., Poschet, G., Allboje Samami, A.,  
775 Wanatabe, M., Sticht, C., Teleman, A.A., et al. (2017). Sulfur availability regulates plant  
776 growth via glucose-TOR signaling. *Nat. Commun.* 8, 1–10.
- 777 40. Cao, P., Kim, S.J., Xing, A., Schenck, C.A., Liu, L., Jiang, N., Wang, J., Last, R.L., and Brandizzi,  
778 F. (2019). Homeostasis of branched-chain amino acids is critical for the activity of TOR  
779 signaling in Arabidopsis. *Elife* 8, 1–24.
- 780 41. Schaufelberger, M., Galbier, F., Herger, A., de Brito Francisco, R., Roffler, S., Clement, G.,  
781 Diet, A., Hörtensteiner, S., Wicker, T., and Ringli, C. (2019). Mutations in the Arabidopsis  
782 ROL17/isopropylmalate synthase 1 locus alter amino acid content, modify the TOR  
783 network, and suppress the root hair cell development mutant *lrx1*. *J. Exp. Bot.* 70, 2313–  
784 2323.
- 785 42. Sun, X., Chen, H., Wang, P., Chen, F., Yuan, L., and Mi, G. (2020). Low nitrogen induces root  
786 elongation via auxin-induced acid growth and auxin-regulated target of rapamycin (TOR)  
787 pathway in maize. *J. Plant Physiol.* 254, 153281.
- 788 43. Liu, Y., Duan, X., Zhao, X., Ding, W., Wang, Y., and Xiong, Y. (2021). Diverse nitrogen signals  
789 activate convergent ROP2-TOR signaling in Arabidopsis. *Dev. Cell* 56, 1283-1295.e5.
- 790 44. Schepetilnikov, M., Makarian, J., Srour, O., Geldreich, A., Yang, Z., Chicher, J., Hammann, P.,  
791 and Ryabova, L.A. (2017). GTP ase ROP 2 binds and promotes activation of target of  
792 rapamycin, TOR, in response to auxin. *EMBO J.* 36, 886–903.
- 793 45. Li, X., Cai, W., Liu, Y., Li, H., Fu, L., Liu, Z., Xu, L., Liu, H., Xu, T., and Xiong, Y. (2017).  
794 Differential TOR activation and cell proliferation in Arabidopsis root and shoot apices.  
795 *Proc. Natl. Acad. Sci. U. S. A.* 114, 2765–2770.
- 796 46. Carol, R.J., Takeda, S., Linstead, P., Durrant, M.C., Kakesova, H., Derbyshire, P., Drea, S.,

## Low temperature perception by FER-TORC1 triggers root hair growth

- 797 Zarsky, V., and Dolan, L. (2005). A RhoGDP dissociation inhibitor spatially regulates growth  
798 in root hair cells. *Nature* *438*, 1013–1016.
- 799 47. Duan, Q., Kita, D., Li, C., Cheung, A.Y., and Wu, H.M. (2010). FERONIA receptor-like kinase  
800 regulates RHO GTPase signaling of root hair development. *Proc. Natl. Acad. Sci. U. S. A.*  
801 *107*, 17821–17826.
- 802 48. Kang, E., Zheng, M., Zhang, Y., Yuan, M., Yalovsky, S., Zhu, L., and Fu, Y. (2017). The  
803 microtubule-associated protein MAP18 affects ROP2 GTPase activity during root hair  
804 growth. *Plant Physiol.* *174*, 202–222.
- 805 49. Denninger, P., Reichelt, A., Schmidt, V.A.F., Mehlhorn, D.G., Asseck, L.Y., Stanley, C.E.,  
806 Keinath, N.F., Evers, J.F., Grefen, C., and Grossmann, G. (2019). Distinct RopGEFs  
807 Successively Drive Polarization and Outgrowth of Root Hairs. *Curr. Biol.* *29*, 1854-1865.e5.
- 808 50. Huang, G.Q., Li, E., Ge, F.R., Li, S., Wang, Q., Zhang, C.Q., and Zhang, Y. (2013). Arabidopsis  
809 RopGEF4 and RopGEF10 are important for FERONIA-mediated developmental but not  
810 environmental regulation of root hair growth. *New Phytol.* *200*, 1089–1101.
- 811 51. Xu, G., Chen, W., Song, L., Chen, Q., Zhang, H., Liao, H., Zhao, G., Lin, F., Zhou, H., and Yu, F.  
812 (2019). FERONIA phosphorylates E3 ubiquitin ligase ATL6 to modulate the stability of 14-3-  
813 3 proteins in response to the carbon/nitrogen ratio. *J. Exp. Bot.* *70*, 6375–6388.
- 814 52. Song, L., Xu, G., Li, T., Zhou, H., Lin, Q., Chen, J., Wang, L., Wu, D., Li, X., Wang, L., et al.  
815 (2022). The RALF1-FERONIA Complex Interacts with and Activates TOR Signaling in  
816 Response to Low Nutrients. *Mol. Plant* *0*.
- 817 53. Kwon, T., Alan Sparks, J., Liao, F., and Blancaflor, E.B. (2018). Erulus is a plasma membrane-  
818 localized receptor-like kinase that specifies root hair growth by maintaining tip-focused  
819 cytoplasmic calcium oscillations[OPEN]. *Plant Cell* *30*, 1173–1177.
- 820 54. Schoenaers, S., Balcerowicz, D., Breen, G., Hill, K., Zdanio, M., Mouille, G., Holman, T.J., Oh,  
821 J., Wilson, M.H., Nikonorova, N., et al. (2018). The Auxin-Regulated CrRLK1L Kinase ERULUS  
822 Controls Cell Wall Composition during Root Hair Tip Growth. *Curr. Biol.* *28*, 722-732.e6.
- 823 55. Xiong, Y., McCormack, M., Li, L., Hall, Q., Xiang, C., and Sheen, J. (2013). Glucose-TOR  
824 signalling reprograms the transcriptome and activates meristems. *Nature* *496*, 181–186.
- 825 56. Montané, M.H., and Menand, B. (2013). ATP-competitive mTOR kinase inhibitors delay  
826 plant growth by triggering early differentiation of meristematic cells but no developmental  
827 patterning change. *J. Exp. Bot.* *64*, 4361–4374.
- 828 57. Escobar-Restrepo, J.M., Huck, N., Kessler, S., Gagliardini, V., Gheyselinck, J., Yang, W.C.,  
829 and Grossniklaus, U. (2007). The Feronia receptor-like kinase mediates male-female  
830 interactions during pollen tube reception. *Science* (80-. ). *317*, 656–660.
- 831 58. Haruta, M., Sabat, G., Stecker, K., Minkoff, B.B., and Sussman, M.R. (2014). A peptide  
832 hormone and its receptor protein kinase regulate plant cell expansion. *Science* (80-. ). *343*,  
833 408–411.
- 834 59. Chakravorty, D., Yu, Y., and Assmann, S.M. (2018). A kinase-dead version of FERONIA  
835 receptor-like kinase has dose-dependent impacts on rosette morphology and RALF1-  
836 mediated stomatal movements. *FEBS Lett.* *592*, 3429–3437.
- 837 60. Vatter, T., Neuhäuser, B., Stetter, M., and Ludewig, U. (2015). Regulation of length and  
838 density of Arabidopsis root hairs by ammonium and nitrate. *J. Plant Res.* *128*, 839–848.
- 839 61. Canales, J., Contreras-López, O., Álvarez, J.M., and Gutiérrez, R.A. (2017). Nitrate induction

## Low temperature perception by FER-TORC1 triggers root hair growth

- 840 of root hair density is mediated by TGA1/TGA4 and CPC transcription factors in *Arabidopsis*  
841 *thaliana*. *Plant J.* *92*, 305–316.
- 842 62. Liu, B., Wu, J., Yang, S., Schiefelbein, J., and Gan, Y. (2020). Nitrate regulation of lateral root  
843 and root hair development in plants. *J. Exp. Bot.* *71*, 4405–4414.
- 844 63. Ho, C.H., Lin, S.H., Hu, H.C., and Tsay, Y.F. (2009). CHL1 Functions as a Nitrate Sensor in  
845 Plants. *Cell* *138*, 1184–1194.
- 846 64. Gojon, A., Krouk, G., Perrine-Walker, F., and Laugier, E. (2011). Nitrate transceptor(s) in  
847 plants. *J. Exp. Bot.* *62*, 2299–2308.
- 848 65. Bouguyon, E., Brun, F., Meynard, D., Kubeš, M., Pervent, M., Leran, S., Lacombe, B., Krouk,  
849 G., Guiderdoni, E., Zazimalová, E., et al. (2015). Multiple mechanisms of nitrate sensing by  
850 *Arabidopsis* nitrate transceptor NRT1.1. *Nat. Plants* *1*, 15015.
- 851 66. Krouk, G., Lacombe, B., Bielach, A., Perrine-Walker, F., Malinska, K., Mounier, E., Hoyerova,  
852 K., Tillard, P., Leon, S., Ljung, K., et al. (2010). Nitrate-regulated auxin transport by NRT1.1  
853 defines a mechanism for nutrient sensing in plants. *Dev. Cell* *18*, 927–937.
- 854 67. Liu, K.-H., and Tsay, Y.-F. (2003). Switching between the two action modes of the dual-  
855 affinity nitrate transporter CHL1 by phosphorylation. *EMBO J.* *22*, 1005–13.
- 856 68. Forde, B.G., and Walch-Liu, P. (2009). Nitrate and glutamate as environmental cues for  
857 behavioural responses in plant roots. *Plant, Cell Environ.* *32*, 682–693.
- 858 69. Leran, S., Varala, K., Boyer, J.C., Chiurazzi, M., Crawford, N., Daniel-Vedele, F., David, L.,  
859 Dickstein, R., Fernandez, E., Forde, B., et al. (2014). A unified nomenclature of nitrate  
860 transporter 1/peptide transporter family members in plants. *Trends Plant Sci.* *19*, 5–9.
- 861 70. Wang, W., Hu, B., Li, A., and Chu, C. (2020). NRT1.1s in plants: Functions beyond nitrate  
862 transport. *J. Exp. Bot.* *71*, 4373–4379.
- 863 71. Deprost, D., Yao, L., Sormani, R., Moreau, M., Leterreux, G., Bedu, M., Robaglia, C., and  
864 Meyer, C. (2007). The *Arabidopsis* TOR kinase links plant growth, yield, stress resistance  
865 and mRNA translation. *EMBO Rep.* *8*, 864–870.
- 866 72. Jones, M.A., Shen, J.J., Fu, Y., Li, H., Yang, Z., and Grierson, C.S. (2002). The *Arabidopsis*  
867 *Rop2* GTPase is a positive regulator of both root hair initiation and tip growth. *Plant Cell*  
868 *14*, 763–776.
- 869 73. Gendre, D., Baral, A., Dang, X., Esnay, N., Boutte, Y., Stanislas, T., Vain, T., Claverol, S.,  
870 Gustavsson, A., Lin, D., et al. (2019). Rho-of-plant activated root hair formation requires  
871 *Arabidopsis* YIP4a/b gene function. *Dev.* *146*.
- 872 74. ROBINSON, D., and RORISON, I.H. (1987). ROOT HAIRS AND PLANT GROWTH AT LOW  
873 NITROGEN AVAILABILITIES. *New Phytol.* *107*, 681–693.
- 874 75. Deak, K.I., and Malamy, J. (2005). Osmotic regulation of root system architecture. *Plant J.*  
875 *43*, 17–28.
- 876 76. Song, Y., Wilson, A.J., Zhang, X.C., Thoms, D., Sohrabi, R., Song, S., Geissmann, Q., Liu, Y.,  
877 Walgren, L., He, S.Y., et al. (2021). FERONIA restricts *Pseudomonas* in the rhizosphere  
878 microbiome via regulation of reactive oxygen species. *Nat. Plants* *7*, 644–654.
- 879 77. Bloch, D., Monshausen, G., Gilroy, S., and Yalovsky, S. (2011). Co-regulation of root hair tip  
880 growth by ROP GTPases and nitrogen source modulated pH fluctuations. *Plant Signal.*  
881 *Behav.* *6*, 426–429.
- 882 78. Salem, M.A., Li, Y., Bajdzienko, K., Fisahn, J., Watanabe, M., Hoefgen, R., Schöttler, M.A.,



## Low temperature perception by FER-TORC1 triggers root hair growth

- 883 and Giavalisco, P. (2018). RAPTOR controls developmental growth transitions by altering  
884 the hormonal and metabolic balance. *Plant Physiol.* *177*, 565–593.
- 885 79. Vidal, E.A., Alvarez, J.M., Araus, V., Riveras, E., Brooks, M.D., Krouk, G., Ruffel, S., Lejay, L.,  
886 Crawford, N.M., Coruzzi, G.M., et al. (2020). Nitrate in 2020: Thirty years from transport to  
887 signaling networks. *Plant Cell* *32*, 2094–2119.
- 888 80. Alvarez, J.M., Riveras, E., Vidal, E.A., Gras, D.E., Contreras-López, O., Tamayo, K.P.,  
889 Aceituno, F., Gómez, I., Ruffel, S., Lejay, L., et al. (2014). Systems approach identifies TGA1  
890 and TGA4 transcription factors as important regulatory components of the nitrate  
891 response of *Arabidopsis thaliana* roots. *Plant J.* *80*, 1–13.
- 892 81. Wullschleger, S., Loewith, R., and Hall, M.N. (2006). TOR signaling in growth and  
893 metabolism. *Cell* *124*, 471–484.
- 894 82. Wang, P., Zhao, Y., Li, Z., Hsu, C.C., Liu, X., Fu, L., Hou, Y.J., Du, Y., Xie, S., Zhang, C., et al.  
895 (2018). Reciprocal Regulation of the TOR Kinase and ABA Receptor Balances Plant Growth  
896 and Stress Response. *Mol. Cell* *69*, 100-112.e6.
- 897 83. Wu, Y., Shi, L., Li, L., Fu, L., Liu, Y., Xiong, Y., and Sheen, J. (2019). Integration of nutrient,  
898 energy, light, and hormone signalling via TOR in plants. *J. Exp. Bot.* *70*, 2227–2238.
- 899 84. Fu, L., Wang, P., and Xiong, Y. (2020). Target of Rapamycin Signaling in Plant Stress  
900 Responses. *Plant Physiol.* *182*, 1613–1623.
- 901 85. Yang, T., Wang, L., Li, C., Liu, Y., Zhu, S., Qi, Y., Liu, X., Lin, Q., Luan, S., and Yu, F. (2015).  
902 Receptor protein kinase FERONIA controls leaf starch accumulation by interacting with  
903 glyceraldehyde-3-phosphate dehydrogenase. *Biochem. Biophys. Res. Commun.* *465*, 77–  
904 82.
- 905 86. Yeats, T.H., Sorek, H., Wemmer, D.E., and Somerville, C.R. (2016). Cellulose Deficiency Is  
906 Enhanced on Hyper Accumulation of Sucrose by a H<sup>+</sup>-Coupled Sucrose Symporter. *Plant*  
907 *Physiol.* *171*, 110–124.
- 908 87. Yu, F., Qian, L., Nibau, C., Duan, Q., Kita, D., Levasseur, K., Li, X., Lu, C., Li, H., Hou, C., et al.  
909 (2012). FERONIA receptor kinase pathway suppresses abscisic acid signaling in *Arabidopsis*  
910 by activating ABI2 phosphatase. *Proc. Natl. Acad. Sci. U. S. A.* *109*, 14693–14698.
- 911 88. Zhu, S., Martínez Pacheco, J., Estevez, J.M., and Yu, F. (2020). Autocrine regulation of root  
912 hair size by the RALF-FERONIA-RSL4 signaling pathway. *New Phytol.* *227*, 45–49.
- 913 89. Jones, D.L., Healey, J.R., Willett, V.B., Farrar, J.F., and Hodge, A. (2005). Dissolved organic  
914 nitrogen uptake by plants—an important N uptake pathway? *Soil Biol. Biochem.* *37*, 413–  
915 423.
- 916 90. Forsum, O., Svennerstam, H., Ganeteg, U., and Näsholm, T. (2008). Capacities and  
917 constraints of amino acid utilization in *Arabidopsis*. *New Phytol.* *179*, 1058–1069.
- 918 91. O’Leary, B.M., Khim Oh, G.G., Lee, C.P., and Harvey Millar, A. (2020). Metabolite regulatory  
919 interactions control plant respiratory metabolism via target of rapamycin (TOR) kinase  
920 activation[open]. *Plant Cell* *32*, 666–682.
- 921 92. Ren, J., Wen, L., Gao, X., Jin, C., Xue, Y., and Yao, X. (2009). DOG 1.0: Illustrator of protein  
922 domain structures. *Cell Res.* *19*, 271–273.
- 923 93. Livak, K.J., and Schmittgen, T.D. (2001). Analysis of relative gene expression data using real-  
924 time quantitative PCR and the 2- $\Delta\Delta$ CT method. *Methods* *25*, 402–408.
